# Supplementary material for: AIEE phenomenon: tetraaryl vs. triaryl pyrazoles
Source: Royal Society of Chemistry journal article supplement (doi:10.1039/c5cc05973a), 2015-01-01
Supplement: c5cc05973a1.pdf [file c5cc05973a1.pdf]

*Electronic Supplementary Information*

**AIEE Phenomenon: Tetraaryl vs Triaryl Pyrazoles**

**Sayani Mukherjee,<sup>a</sup> P. S. Salini,<sup>a</sup> A. Srinivasan<sup>a</sup> and S. Peruncheralathan<sup>a\*</sup>**

<sup>a</sup>School of Chemical Sciences, National Institute of Science Education and Research, Institute of Physics Campus, Sainik School (PO), Bhubaneswar-751005, Odisha, India

| <b>Table of Contents:</b>                                                                              | Page No. |
|--------------------------------------------------------------------------------------------------------|----------|
| General Consideration                                                                                  | ESI-2    |
| General Procedure for Synthesis of 1,3,5-Triarylpyrazoles                                              | ESI-3    |
| General Procedure for Synthesis of 4-Bromo-1,3,5-triaryl-1 <i>H</i> -pyrazoles                         | ESI-5    |
| Optimization of Cross-coupling of 4-Bromo-1,3,5-triphenyl-1 <i>H</i> -pyrazole with Phenylboronic Acid | ESI-8    |
| General Procedure for Synthesis of 1,3,4,5-Tetraaryl-1 <i>H</i> -pyrazoles by Suzuki Reaction          | ESI-8    |
| References                                                                                             | ESI-13   |
| Titration Experiments and Crystal Structural Analysis                                                  | ESI-14   |
| NMR Spectra of the Isolated Products                                                                   | ESI-31   |

## EXPERIMENTAL SECTION

### General Consideration

#### Reagents

All experiments were carried out in oven-dried glasswares under nitrogen atmosphere. 1,3-Diphenylpropan-1,3-dione, aryl and heteroaryl hydrazines were purchased from Aldrich and Acros and used as received. Pd(PPh<sub>3</sub>)<sub>4</sub>, aryl and heteroaryl boronic acids were purchased from Aldrich. N-Bromosuccinimide was purchase from Aldrich and recrystallized from water. Cs<sub>2</sub>CO<sub>3</sub>, KOH, K<sub>2</sub>CO<sub>3</sub> and Et<sub>3</sub>N were purchased from Aldrich, Acros, Merck or Alfa-Aesar and used as received. All other reagents were purchased from common suppliers and used without further purification. Flash chromatography was performed by using Merck Silica gel 60 (230–400 mesh). Reactions were monitored by thin-layer chromatography on pre-coated with silica gel 60 F254 plates (Merck & co.) and were visualized by UV. 1,3,4-triphenylpyrazole was synthesized by reported method.<sup>1</sup>

#### Analytical Methods

<sup>1</sup>H and <sup>13</sup>C spectra were recorded in CDCl<sub>3</sub> solution using Bruker Avance DRX(400 MHz). The signals were referenced to residual chloroform (7.26 ppm, 77.16 ppm, <sup>13</sup>C). Chemical shifts are reported in ppm, multiplicities are indicated by s (singlet), d (doublet), t (triplet), dd (doublet of a doublet). Gas chromatography analysis was performed on ThermoFisher ITQ 900 instrument with a FID detector and HP-5 capillary column (polydimethylsiloxane with 5% phenyl groups, 30 m, 0.32 mm i.d., 0.25 μm film thickness) using helium as carrier gas. Gas chromatography-mass analysis was carried out on ThermoFisher ITQ 900 instrument (EI) and TG-SQC capillary column using helium carrier gas. ESI HR-MS measurements were performed on Bruker micrOTOF-Q-II mass-spectrometer. The fluorescence spectra were recorded on a SPEX-Fluorolog F112X spectrofluorimeter. The electronic absorption spectra were recorded with Shimadzu 3101PC UV-Vis-NIR Scanning spectrophotometer. DLS analyses were carried out with a Zetasizer Nano S from Malvern Instruments at 25°C. The X-ray quality crystals for the compounds were grown by slow diffusion of *n*-hexane over CH<sub>2</sub>Cl<sub>2</sub> solution. Single-crystal X-ray diffraction data of **2a**, **2i** and **4a** were collected in a Bruker KAPPA APEX-II, four angle rotation system, Mo-Kα radiation (0.71073 Å).

### Scheme 1: General Procedure for Synthesis of 1,3,5-Triaryl-1*H*-pyrazoles

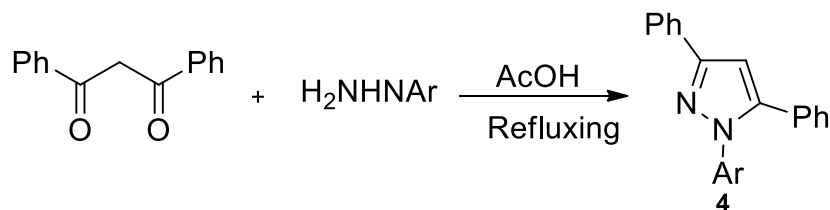

To a solution of 1,3-diphenylpropan-1,3-dione (2.46 g, 11 mmol) in AcOH (20 mL) was added arylhydrazine (13 mmol) at room temperature. The reaction mixture was refluxed until 1,3-diketone was consumed. The reaction mixture was cooled and neutralized by saturated sodium carbonate solution. The aqueous phase was extracted with CH<sub>2</sub>Cl<sub>2</sub>. The combined extracts were washed with brine, dried over Na<sub>2</sub>SO<sub>4</sub> and concentrated under reduced pressure. Purification of the crude product by flash chromatography afforded the corresponding pyrazole as a colourless solid.

#### 1,3,5-Triphenyl-1*H*-pyrazole (**4a**)<sup>2</sup>

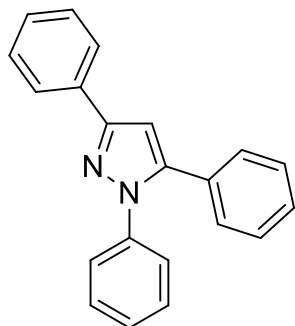

Yield: 2.61 g (80%) as a colourless solid.

Melting point: 130 – 132 °C

R<sub>f</sub>: 0.31 in 5% ethyl acetate in hexane

IR (ν cm<sup>-1</sup>, in KBr): 3448, 3120, 3061, 1596, 1497, 1482, 1457, 1433, 1363, 1213, 1174, 1065, 1021, 972, 957, 921, 814, 765, 700, 693, 504.

<sup>1</sup>H NMR (400 MHz, CDCl<sub>3</sub>): δ = 7.94 – 7.92 (m, 2H), 7.46 – 7.42 (m, 2H), 7.34 – 7.28 (m, 11H), 6.83 (s, 1H).

<sup>13</sup>C NMR (100 MHz, CDCl<sub>3</sub>): δ = 152.10, 144.53, 140.26, 133.17, 130.71, 129.05, 128.88, 128.78, 128.61, 128.43, 128.13, 127.57, 125.95, 125.45, 105.34.

HR-MS (ESI): Calcd. for C<sub>21</sub>H<sub>16</sub>N<sub>2</sub> (M+H): 297.1386, found: 297.1354.

### 1-(4-Methoxyphenyl)-3,5-diphenyl-1H-pyrazole (4b)<sup>3</sup>

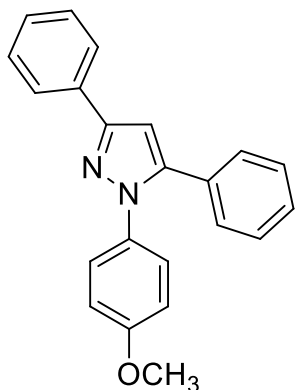

Yield: 2.69 g (75%) as a colourless solid.

Melting point: 101 – 104 °C

R<sub>f</sub>: 0.68 in 10% ethyl acetate in hexane

<sup>1</sup>H NMR (400 MHz, CDCl<sub>3</sub>): δ = 7.92 (dd, *J* = 8.3, 1.2 Hz, 2H), 7.46 – 7.40 (m, 2H), 7.36 – 7.27 (m, 8H), 6.90 – 6.84 (m, 2H), 6.81 (s, 1H), 3.82 (s, 3H).

<sup>13</sup>C NMR (100 MHz, CDCl<sub>3</sub>): δ = 158.99, 151.77, 144.49, 133.59, 133.30, 130.75, 128.84, 128.77, 128.59, 128.32, 128.03, 126.89,

125.93, 114.25, 104.78, 55.64.

HR-MS (ESI): Calcd. for C<sub>22</sub>H<sub>18</sub>N<sub>2</sub>O (M+H): 327.1492, found: 327.1520.

### 1-(4-Trifluoromethylphenyl)-3,5-diphenyl-1H-pyrazole (4c)

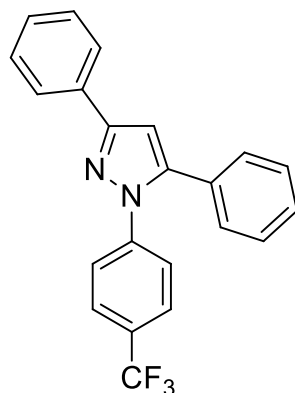

Yield: 3.12 g (78%) as a colourless solid.

Melting point: 113 – 115 °C

R<sub>f</sub>: 0.51 in 2% ethyl acetate in hexane

IR (ν cm<sup>-1</sup>, in KBr): 3064, 2372, 1611, 1523, 1509, 1484, 1458, 1410, 1364, 1325, 1168, 1159, 1125, 1108, 1075, 1057, 1016, 969, 851, 766, 697, 613.

<sup>1</sup>H NMR (400 MHz, CDCl<sub>3</sub>): δ = 7.98 – 7.86 (m, 2H), 7.60 (d, *J* = 8.4 Hz, 2H), 7.51 (d, *J* = 8.4 Hz, 2H), 7.45 (t, *J* = 7.5 Hz, 2H), 7.43 – 7.34

(m, 4H), 7.31 (dt, *J* = 7.6, 3.9 Hz, 2H), 6.85 (s, 1H).

<sup>13</sup>C NMR (100 MHz, CDCl<sub>3</sub>): δ = 152.81, 144.74, 142.94, 132.76, 130.38, 129.05 (q, *J* = 33 Hz), 128.92, 128.87 (2C), 128.84, 128.44, 126.14 (q, *J* = 4 Hz), 125.97, 124.91, 124.00 (q, *J* = 271 Hz), 106.39.

HR-MS (ESI): Calcd. for C<sub>22</sub>H<sub>15</sub>N<sub>2</sub>F<sub>3</sub> (M+H): 365.1260, found: 365.1245.

### 1-(2-Pyridyl)-3,5-diphenyl-1H-pyrazole (4d)<sup>4</sup>

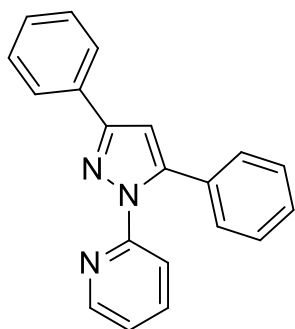

Yield: 1.80 g (55%) as a colourless solid.

Melting point: 104 – 106 °C

R<sub>f</sub>: 0.26 in 20 % ethyl acetate in hexane

IR ( $\nu$  cm<sup>-1</sup>, in KBr): 2373, 2345, 1580, 1469, 1362, 1329, 1074, 791, 765, 742, 699, 670, 460.

<sup>1</sup>H NMR (400 MHz, CDCl<sub>3</sub>):  $\delta$  = 8.38 (ddd,  $J$  = 4.9, 2.0, 0.8 Hz, 1H), 7.96 – 7.93 (m, 2H), 7.77 (ddd,  $J$  = 8.0, 7.4, 2.0 Hz, 1H), 7.60 – 7.56 (m, 1H), 7.47 – 7.41 (m, 2H), 7.39 – 7.28 (m, 6H), 7.22 (ddd,  $J$  = 7.4, 4.9, 0.8 Hz, 1H), 6.84 (s, 1H).

<sup>13</sup>C NMR (100 MHz, CDCl<sub>3</sub>):  $\delta$  = 152.79, 152.71, 148.61, 145.23, 138.34, 132.95, 131.20, 128.85, 128.77, 128.40, 128.37 (2C), 126.15, 122.55, 119.09, 106.57.

HR-MS (ESI): Calcd. for C<sub>20</sub>H<sub>15</sub>N<sub>3</sub> (M+H): 298.1339, found: 298.1372.

### Scheme 2: General Procedure for Synthesis of 4-Bromo-1,3,5-triaryl-1H-pyrazoles

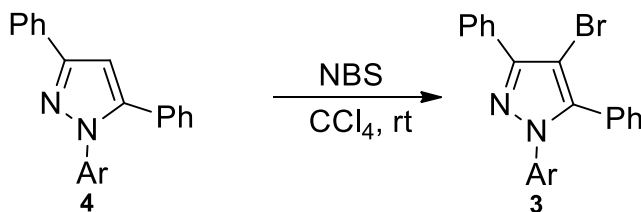

To a solution of 1,3,5-triarylpyrazole (8 mmol) in CCl<sub>4</sub> (50 mL) was added N-bromosuccinimide (1.71 g, 9.6 mmol) at room temperature. The reaction mixture was stirred at the same temperature until the pyrazole was consumed. The reaction mixture was poured into H<sub>2</sub>O and was extracted with CH<sub>2</sub>Cl<sub>2</sub>. The combined extracts were washed with brine, dried over Na<sub>2</sub>SO<sub>4</sub> and concentrated under reduced pressure. Purification of the crude product by flash chromatography afforded the corresponding pyrazole as a colourless solid.

#### 4-Bromo-1,3,5-triphenyl-1H-pyrazole (3a)<sup>2</sup>

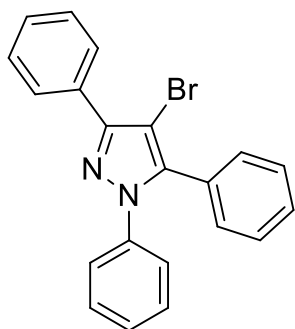

Yield: 2.43 g (81%) as a colourless solid.

Melting point: 224 – 226 °C

R<sub>f</sub>: 0.35 in 5% ethyl acetate in hexane

IR ( $\nu$  cm<sup>-1</sup>, in KBr): 3047, 1482, 1492, 1453, 1358, 1157, 1091, 1072, 1029, 963, 769, 760, 693, 674.

<sup>1</sup>H NMR (400 MHz, CDCl<sub>3</sub>):  $\delta$  = 8.02 – 7.99 (m, 2H), 7.50 – 7.46 (m, 2H), 7.43 – 7.38 (m, 4H), 7.36 – 7.27 (m, 7H).

<sup>13</sup>C NMR (100 MHz, CDCl<sub>3</sub>):  $\delta$  = 149.87, 142.15, 139.91, 132.08, 130.34, 129.16, 129.12, 129.03, 128.65, 128.58, 128.50, 128.21, 127.73, 124.94, 95.04.

HR-MS (ESI): Calcd. for C<sub>21</sub>H<sub>15</sub>N<sub>2</sub>Br (M+H): 375.0491, found: 375.0497.

377.0471, found: 377.0479.

#### 4-Bromo-1-(4-methoxyphenyl)-3,5-diphenyl-1H-pyrazole (3b)

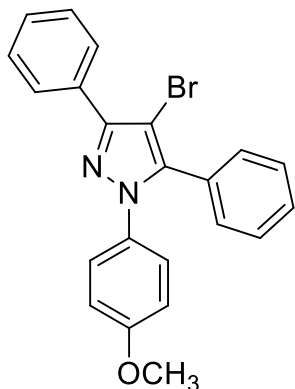

Yield: 3.14 g (97%) as a colourless solid.

Melting point: 109 – 110 °C

R<sub>f</sub>: 0.36 in 20 % ethyl acetate in hexane

IR ( $\nu$  cm<sup>-1</sup>, in KBr): 2933, 2835, 2345, 1542, 1509, 1479, 1458, 1357, 1301, 1243, 1169, 1108, 1026, 968, 837, 806, 768, 730, 699, 615, 531.

<sup>1</sup>H NMR (400 MHz, CDCl<sub>3</sub>):  $\delta$  = 8.01 – 7.98 (m, 2H), 7.49 – 7.44 (m, 2H), 7.42 – 7.32 (m, 6H), 7.20 (dd, *J* = 6.8, 2.0 Hz, 2H), 6.81 (dd, *J* = 6.8, 2.0 Hz, 2H), 3.78 (s, 3H).

<sup>13</sup>C NMR (100 MHz, CDCl<sub>3</sub>):  $\delta$  = 159.02, 149.50, 142.15, 133.22, 132.21, 130.36, 129.19, 129.03, 128.59, 128.47 (2C), 128.19, 126.41, 114.16, 94.42, 55.60.

HR-MS (ESI): Calcd. for C<sub>22</sub>H<sub>17</sub>N<sub>2</sub>OBr (M+H): 405.0471, found: 405.0552.

407.0451, found: 407.0533.

#### 4-Bromo-1-(4-trifluoromethylphenyl)-3,5-diphenyl-1H-pyrazole (3c)

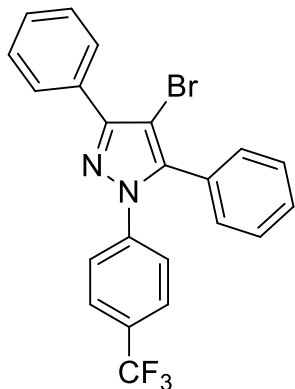

Yield: 3.44 g (97%) as a colourless solid.

Melting point: 104 –106 °C

R<sub>f</sub>: 0.51 in 20 % ethyl acetate in hexane

IR ( $\nu$  cm<sup>-1</sup>, in KBr): 3448, 2372, 2345, 1701, 1324, 1167, 1121, 1065, 842, 765, 695, 460.

<sup>1</sup>H NMR (400 MHz, CDCl<sub>3</sub>):  $\delta$  = 8.03 – 8.00 (m, 2H), 7.57 (d,  $J$  = 8.8 Hz, 2H), 7.52 – 7.48 (m, 2H), 7.47 – 7.42 (m, 6H), 7.38 – 7.34 (m, 2H).

<sup>13</sup>C NMR (100 MHz, CDCl<sub>3</sub>):  $\delta$  = 150.66, 142.57, 142.40, 131.74, 130.29, 129.61, 129.36 (q,  $J$  = 33 Hz), 128.99, 128.88, 128.86, 128.59, 128.21, 126.22 (q,  $J$  = 4 Hz), 123.88 (q,  $J$  = 270 Hz), 124.48, 96.29.

HR–MS (ESI): Calcd. for C<sub>22</sub>H<sub>14</sub>N<sub>2</sub>F<sub>3</sub>Br (M+H): 443.0365, found: 443.0377.

445.0346, found: 445.0364.

#### 4-Bromo-1-(2-pyridyl)-3,5-diphenyl-1H-pyrazole (3d)<sup>4</sup>

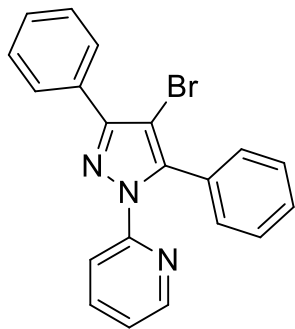

Yield: 2.86 g (95%) as a colourless solid.

Melting point: 121 °C

R<sub>f</sub>: 0.28 in 20 % ethyl acetate in hexane

IR ( $\nu$  cm<sup>-1</sup>, in KBr): 3056, 1590, 1483, 1471, 1360, 1313, 1161, 1143, 1087, 1074, 1030, 995, 980, 967, 925, 771, 706, 697, 617, 512, 463.

<sup>1</sup>H NMR (400 MHz, CDCl<sub>3</sub>):  $\delta$  = 8.32 (ddd,  $J$  = 4.8, 2.0, 0.8 Hz, 1H), 8.04 – 8.01 (m, 2H), 7.74 (ddd,  $J$  = 8.1, 7.4, 2.0 Hz, 1H), 7.53 (dt,  $J$  = 8.0, 0.8 Hz, 1H), 7.51 – 7.45 (m, 2H), 7.44 – 7.34 (m, 6H), 7.20 (ddd,  $J$  = 7.4, 4.8, 0.8 Hz, 1H).

<sup>13</sup>C NMR (100 MHz, CDCl<sub>3</sub>):  $\delta$  = 152.27, 150.60, 148.57, 142.70, 138.37, 131.92, 130.17, 129.74, 128.94, 128.77, 128.47, 128.39 (2C), 122.76, 118.58, 96.45.

HR–MS (ESI): Calcd. for C<sub>20</sub>H<sub>14</sub>N<sub>3</sub>Br (M+H): 376.0443, found: 376.0100.

378.0424, found: 378.0079.

**Scheme 3: Optimization of Cross-coupling of 4-Bromo-1,3,5-triphenyl-1H-pyrazole with Phenyl boronic Acid**

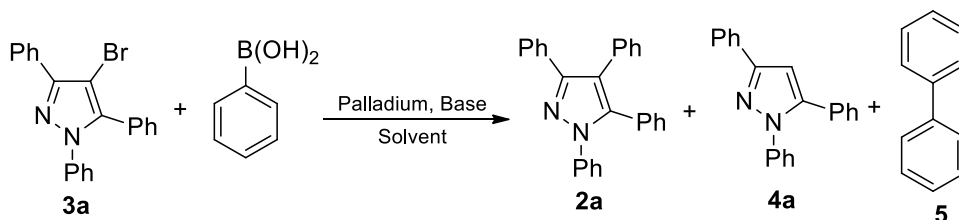

**Table 1: Standardization of Cross-coupling Reaction<sup>a</sup>**

| S. No            | Base                                 | Solvent           | Catalyst                           | Product |     |      |
|------------------|--------------------------------------|-------------------|------------------------------------|---------|-----|------|
|                  |                                      |                   |                                    | 2a      | 4a  | 5    |
| 1                | Na <sub>2</sub> CO <sub>3</sub> (2M) | <sup>i</sup> PrOH | Pd(PPh <sub>3</sub> ) <sub>4</sub> | 11%     | 36% | 20%  |
| 2                | Na <sub>2</sub> CO <sub>3</sub> (2M) | <sup>i</sup> PrOH | Pd(dba) <sub>2</sub>               | -       | 70% | 15 % |
| 3                | Ba(OH) <sub>2</sub> (2M)             | Toluene           | Pd(PPh <sub>3</sub> ) <sub>4</sub> | 38%     | 17% | 5 %  |
| 4                | Cs <sub>2</sub> CO <sub>3</sub>      | Toluene           | Pd(PPh <sub>3</sub> ) <sub>4</sub> | 38%     | 17  | -    |
| 5                | Cs <sub>2</sub> CO <sub>3</sub>      | THF               | Pd(PPh <sub>3</sub> ) <sub>4</sub> | 38%     | 17  | -    |
| 6                | Cs <sub>2</sub> CO <sub>3</sub>      | Toluene           | Pd(PPh <sub>3</sub> ) <sub>4</sub> | 16%     | -   | -    |
| 7 <sup>b</sup>   | Cs <sub>2</sub> CO <sub>3</sub>      | THF               | Pd(PPh <sub>3</sub> ) <sub>4</sub> | 64%     | -   | -    |
| 7 <sup>b,c</sup> | Cs <sub>2</sub> CO <sub>3</sub>      | THF               | Pd(PPh <sub>3</sub> ) <sub>4</sub> | 75%     | -   | -    |

<sup>a</sup>Reaction Conditions: 4-Bromopyrazole (0.5 mmol), Phenyl Boronic Acid (0.6 mmol), Catalyst (5 mol-%), Base (1.5 mmol), Solvent (2 mL), 80 °C, 12 h;

<sup>b</sup>Reaction was performed in Sealed tube; <sup>c</sup>Reaction time was 16 h.

**Scheme 4: General Procedure for Synthesis of 1,3,4,5-Tetraaryl-1H-pyrazoles by Suzuki Reaction**

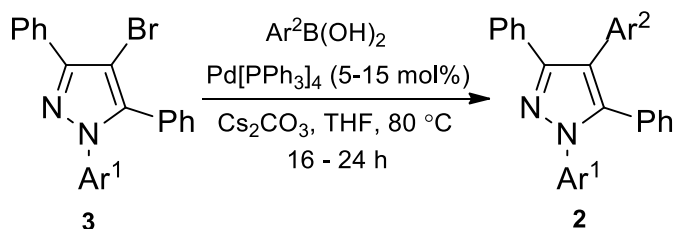

An oven-dried sealed tube was charged with Pd(PPh<sub>3</sub>)<sub>4</sub> (5-15 mol%), 4-bromo-1,3,5-triarylpyrazole (0.45 mmol), arylboronic acid (0.54 mmol) and Cs<sub>2</sub>CO<sub>3</sub> (0.67 mmol) in THF (5 mL) and was stirred at 80°C. The reaction was monitored by TLC or GC/MS analysis. After the



starting material was completely consumed, the reaction mixture was then cooled to room temperature and was purified by flash chromatography.

### 1,3,4,5-Tetraphenyl-1*H*-pyrazole (2a)<sup>5</sup>

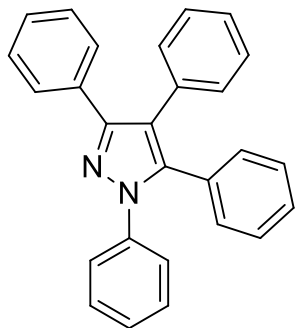

Yield: 0.126 g (75%) as a colourless solid.

Melting point: 202 °C

R<sub>f</sub>: 0.47 in 20 % ethyl acetate in hexane

UV (λ<sub>max</sub>): 240 nm (15 μM solution in CH<sub>3</sub>CN)

IR (ν cm<sup>-1</sup>, in KBr): 2925, 2854, 2372, 2345, 1594, 1496, 1458, 1362, 1074, 964, 921, 793, 746, 768, 700, 650.

<sup>1</sup>H NMR (400 MHz, CDCl<sub>3</sub>): δ = 7.54 – 7.52 (m, 2H), 7.36 – 7.28 (m, 8H), 7.24 – 7.18 (m, 6H), 7.13 – 7.10 (m, 2H), 7.08 – 7.05 (m, 2H).

<sup>13</sup>C NMR (100 MHz, CDCl<sub>3</sub>): δ = 150.30, 141.54, 140.0, 133.21, 133.19, 133.16, 130.84, 130.56, 130.17, 128.89, 128.54, 128.39, 128.32, 128.29, 127.78, 127.37, 126.80, 125.47, 120.85.

HR–MS (ESI): Calcd. for C<sub>27</sub>H<sub>20</sub>N<sub>2</sub>(M+H): 373.1699, Found: 373.1728.

### 4-(4-Methoxyphenyl)-1,3,5-triphenyl-1*H*-pyrazole (2b)

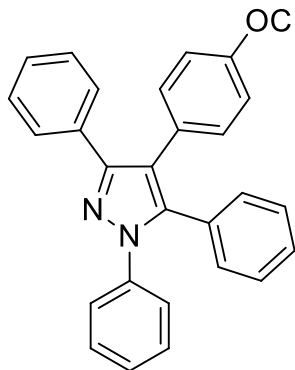

Yield: 0.116 g (64%) as a colourless solid.

Melting point: 138 °C

R<sub>f</sub>: 0.26 in 5% ethyl acetate in hexane

IR (ν cm<sup>-1</sup>, in KBr): 3050, 3003, 2926, 1595, 1553, 1508, 1496, 1361, 1246, 1174, 1028, 969, 837, 770, 760, 700.

<sup>1</sup>H NMR (400 MHz, CDCl<sub>3</sub>): 7.76 – 7.54 (m, 2H), 7.32 – 7.20 (m, 11H), 7.08 – 7.05 (m, 2H), 7.03 – 7.01 (m, 2H), 6.76 (d, *J* = 8.4 Hz, 2H), 3.78 (s, 3H).

<sup>13</sup>C NMR (100 MHz, CDCl<sub>3</sub>): δ = 158.50, 150.29, 141.41, 140.09, 133.31, 131.88, 130.57, 130.30, 128.88, 128.50, 128.39, 128.32, 128.21, 127.72, 127.32, 125.45, 125.40, 120.47, 113.83, 55.23.

HR–MS (ESI): Calcd. for C<sub>28</sub>H<sub>22</sub>N<sub>2</sub>O(M+H): 403.1805, found: 403.1853.

#### 4-(2-Methoxyphenyl)-1,3,5-triphenyl-1H-pyrazole (2c)

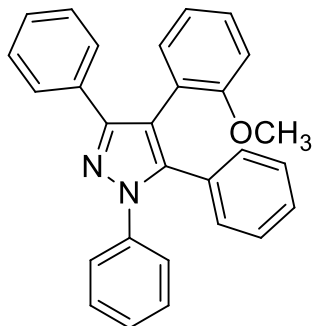

Yield: 0.132 g (73%) as a colourless solid.

Melting point: 116 °C

R<sub>f</sub>: 0.23 in 20 % ethyl acetate in hexane

IR ( $\nu$  cm<sup>-1</sup>, in KBr): 2373, 2345, 1593, 1495, 1364, 1273, 1249, 1179, 1113, 1074, 1024, 970, 791, 763, 733, 699, 670.

<sup>1</sup>H NMR (400 MHz, CDCl<sub>3</sub>):  $\delta$  = 7.54 – 7.52 (m, 2H), 7.35 – 7.34 (m, 2H), 7.30 – 7.28 (m, 2H), 7.27 – 7.22 (m, 5H), 7.20 – 7.14 (m, 3H),

7.06 – 7.01 (m, 3H), 6.84–6.81 (m, 2H), 3.36 (s, 3H).

<sup>13</sup>C NMR (100 MHz, CDCl<sub>3</sub>):  $\delta$  = 157.65, 150.76, 141.98, 140.18, 133.91, 132.79, 130.78, 129.95, 128.83(2C), 128.18, 128.17, 127.99, 127.66, 127.54, 127.17, 125.41, 122.47, 120.69, 117.10, 111.33, 55.11.

HR-MS (ESI): Calcd. for C<sub>28</sub>H<sub>22</sub>N<sub>2</sub>O (M+H): 403.1805, found: 403.1777.

#### 4-(4-Formylphenyl)-1,3,5-triphenyl-1H-pyrazole (2d)

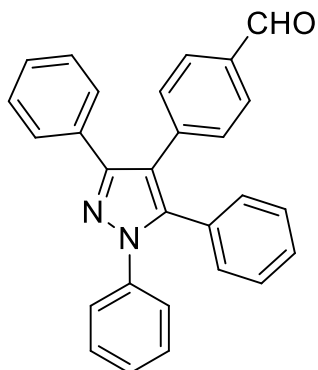

Yield: 0.067 g (37%) as a colourless solid.

Melting point: 147–148 °C

R<sub>f</sub>: 0.44 in 25 % ethyl acetate in hexane

IR ( $\nu$  cm<sup>-1</sup>, in KBr): 2925, 2373, 2345, 1718, 1700, 1604, 1496, 1363, 1212, 1172, 1062, 970, 835, 769, 697.

<sup>1</sup>H NMR (400 MHz, CDCl<sub>3</sub>):  $\delta$  = 9.96 (s, 1H), 7.71 (d,  $J$  = 8.4 Hz, 2H), 7.49 – 7.47 (m, 2H), 7.31 – 7.29 (m, 9H), 7.25 – 7.21 (m, 4H), 7.06– 7.05 (m, 2H).

<sup>13</sup>C NMR (100 MHz, CDCl<sub>3</sub>):  $\delta$  = 192.10, 150.54, 141.96, 140.05, 139.73, 134.71, 132.73, 131.25, 130.52, 129.76, 129.69, 128.99, 128.76, 128.73, 128.70, 128.55, 128.18, 127.68, 125.51, 119.59.

HR-MS (ESI): Calcd. for C<sub>28</sub>H<sub>20</sub>N<sub>2</sub>O (M+H): 401.1648, found: 401.1594.

### 1-(4-Methoxyphenyl)-3,4,5-triphenyl-1H-pyrazole (2e)

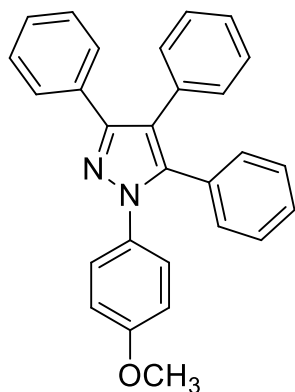

Yield: 0.127 mg (70%) as a colourless solid.

Melting point: 186 °C

R<sub>f</sub>: 0.32 in 20% ethyl acetate in hexane

IR ( $\nu$  cm<sup>-1</sup>, in KBr): 3807, 2931, 2372, 2345, 1542, 1512, 1298, 1253, 1167, 1066, 1032, 969, 834, 771, 724, 699, 614, 540, 463.

<sup>1</sup>H NMR (400 MHz, CDCl<sub>3</sub>):  $\delta$  = 7.53 – 7.51 (m, 2H), 7.29 – 7.18 (m, 11H), 7.12–7.09 (m, 2H), 7.05 (dd,  $J$  = 8.2, 1.6 Hz, 2H), 6.85 – 6.81 (m, 2H), 3.80 (s, 3H).

<sup>13</sup>C NMR (100 MHz, CDCl<sub>3</sub>):  $\delta$  = 158.79, 149.96, 141.51, 133.39, 133.37 (2C), 130.85, 130.59, 130.25, 128.54, 128.35, 128.31 (2C), 128.16, 127.67, 126.86, 126.71, 120.39, 114.08, 55.60.

HR–MS (ESI): Calcd. for C<sub>28</sub>H<sub>22</sub>N<sub>2</sub>O (M+H): 403.1805, found: 403.1803.

### 1,4-Di(4-methoxyphenyl)-3,5-diphenyl-1H-pyrazole (2f)

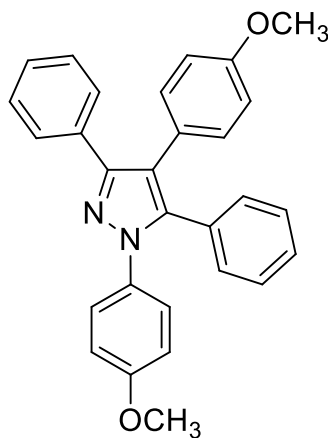

Yield: 0.136 mg (70%) as a colourless solid.

Melting point: 187–188 °C

R<sub>f</sub>: 0.26 in 20% ethyl acetate in hexane

IR ( $\nu$  cm<sup>-1</sup>, in KBr): 3456, 2932, 1546, 1515, 1458, 1370, 1291, 1250, 1171, 1035, 971, 838, 771, 702, 680.

<sup>1</sup>H NMR (400 MHz, CDCl<sub>3</sub>):  $\delta$  = 7.55 – 7.53 (m, 2H), 7.31 – 7.24 (m, 4H), 7.22–7.17 (m, 4H), 7.05 (dd,  $J$  = 8.0, 2.0 Hz, 2H), 7.03 – 6.99 (m, 2H), 6.85 – 6.79 (m, 2H), 6.77 – 6.73 (m, 2H), 3.79 (s, 3H), 3.77 (s, 3H).

<sup>13</sup>C NMR (100 MHz, CDCl<sub>3</sub>):  $\delta$  = 158.8, 158.47, 149.82, 141.46, 133.28, 133.25, 131.87, 130.58, 130.26, 128.51, 128.35, 128.31, 128.12, 127.68, 126.88, 125.47, 120.00, 114.08, 113.83, 55.59, 55.23.

HR–MS (ESI): Calcd. for C<sub>29</sub>H<sub>24</sub>N<sub>2</sub>O<sub>2</sub> (M+H): 433.1911, found: 433.1856.

### 1-(4-Trifluoromethylphenyl)-3,4,5-triphenyl-1H-pyrazole (2g)

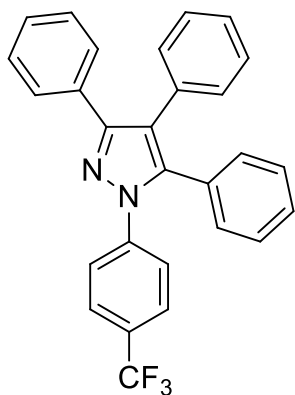

Yield: 0.135 mg (68%) as a colourless solid.

Melting point: 175 °C

R<sub>f</sub>: 0.34 in 4% ether in hexane

IR (ν cm<sup>-1</sup>, in KBr): 3057, 2372, 2345, 1609, 1522, 1437, 1366, 1327, 1162, 1123, 1106, 1073, 1058, 1018, 967, 846, 776, 797, 766, 735, 726, 697, 684, 662, 593.

<sup>1</sup>H NMR (400 MHz, CDCl<sub>3</sub>): δ = 7.57 (d, *J* = 8.4 Hz, 2H), 7.56 – 7.48 (m, 2H), 7.46 (d, *J* = 8.4 Hz, 2H), 7.33–7.28 (m, 5H), 7.24 – 7.20 (m,

4H), 7.11–7.08 (m, 4H).

<sup>13</sup>C NMR (100 MHz, CDCl<sub>3</sub>): δ = 151.15, 142.80, 141.66, 132.84, 132.74, 130.76, 130.49, 129.86, 128.93 (q, *J* = 33 Hz), 128.73 (2C), 128.48, 128.41, 128.38, 128.07, 127.04, 126.07 (q, *J* = 4 Hz), 124.93, 124.01 (q, *J* = 270 Hz), 121.83.

HR–MS (ESI): Calcd. for C<sub>28</sub>H<sub>19</sub>F<sub>3</sub>N<sub>2</sub> (M+H): 441.1573, found: 441.1513.

### 1-(2-Pyridyl)-3,4,5-triphenyl-1H-pyrazole (2i)

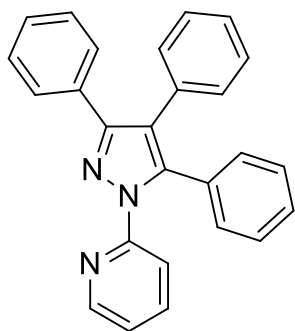

Yield: 0.114 mg (68%) as a colourless solid (15 mol% of catalyst).

Melting point: 174 °C

R<sub>f</sub>: 0.34 in 50% ether in hexane

IR (ν cm<sup>-1</sup>, in KBr): 2372, 2345, 1586, 1458, 1470, 1449, 1361, 1179, 1146, 1074, 991, 971, 800, 787, 770, 742, 701, 651.

<sup>1</sup>H NMR (400 MHz, CDCl<sub>3</sub>): δ = 8.35 (ddd, *J* = 5.0, 1.6, 0.8 Hz, 1H), 7.75 – 7.71 (m, 1H), 7.54 – 7.51 (m, 3H), 7.29 – 7.27 (m, 3H), 7.23 –

7.18 (m, 7H), 7.14 – 7.07 (m, 4H).

<sup>13</sup>C NMR (100 MHz, CDCl<sub>3</sub>): δ = 152.58, 151.19, 148.63, 141.92, 138.19, 133.07, 133.01, 130.89, 130.59, 130.39, 128.62, 128.31, 128.27, 128.15, 128.11, 127.92, 126.92, 122.46, 121.81, 119.28.

HR–MS (ESI): Calcd. for C<sub>26</sub>H<sub>19</sub>N<sub>3</sub> (M+H): 374.1651, found: 374.1674.

#### 4-(2-Fluoro-3-pyridyl)-1,3,5-triphenyl-1H-pyrazole (2h)

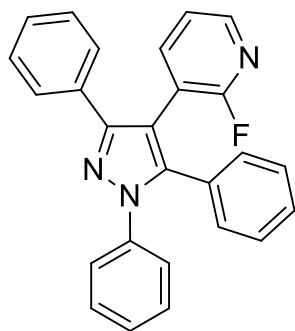

Yield: 0.132 g (75%) as a colourless solid (15 mol% of catalyst).

Melting point: 225 °C

R<sub>f</sub>: 0.25 in 20 % ethyl acetate in hexane

IR (ν cm<sup>-1</sup>, in KBr): 3448, 2925, 2372, 2345, 1498, 1426, 1365, 1246, 1211, 1111, 1073, 102, 971, 844, 809, 790, 767, 738, 700, 670.

<sup>1</sup>H NMR (400 MHz, CDCl<sub>3</sub>): δ = 8.14 (d, *J* = 4.4 Hz, 1H), 7.55 – 7.48 (m, 3H), 7.36 – 7.27 (m, 9H), 7.24 – 7.20 (m, 2H), 7.10 – 7.06 (m, 3H).

<sup>13</sup>C NMR (100 MHz, CDCl<sub>3</sub>): δ = 161.43 (d, *J* = 239.0 Hz), 150.84, 146.89 (d, *J* = 14 Hz), 143.57 (d, *J* = 5.0 Hz), 142.86, 139.75, 132.77, 129.93, 129.57, 128.98, 128.77, 128.66, 128.61, 128.18, 127.86, 127.66, 125.36, 121.38 (d, *J* = 5.0 Hz), 116.51 (d, *J* = 31. Hz), 112.73 (d, *J* = 4.0 Hz).

HR-MS (ESI): Calcd. for C<sub>26</sub>H<sub>18</sub>N<sub>3</sub>F(M+H): 392.1558, found: 392.1633.

#### References:

1. S. Peruncheralathan, T. A. Khan, H. Ila, H. Junjappa *J. Org. Chem.* **2005**, *70*, 10030.
2. X. Li, L. He, H. Chen, W. Wu, H. Jiang, *J. Org. Chem.*, **2013**, *78*, 3636.
3. R. N. Butler, J. M. Hanniffy, J. C. Stephens, L. A. Burke, *J. Org. Chem.*, **2008**, *73*, 1354.
4. M. A. Khan, A. Augusto, A. Pinto, *J. Heterocyclic Chem.*, **1981**, *18*, 9.
5. M. Komatsu, Y. Yoshida, M. Uesaka, Y. Ohshiro, T. Agawa, *J. Org. Chem.*, **1984**, *49*, 1300.

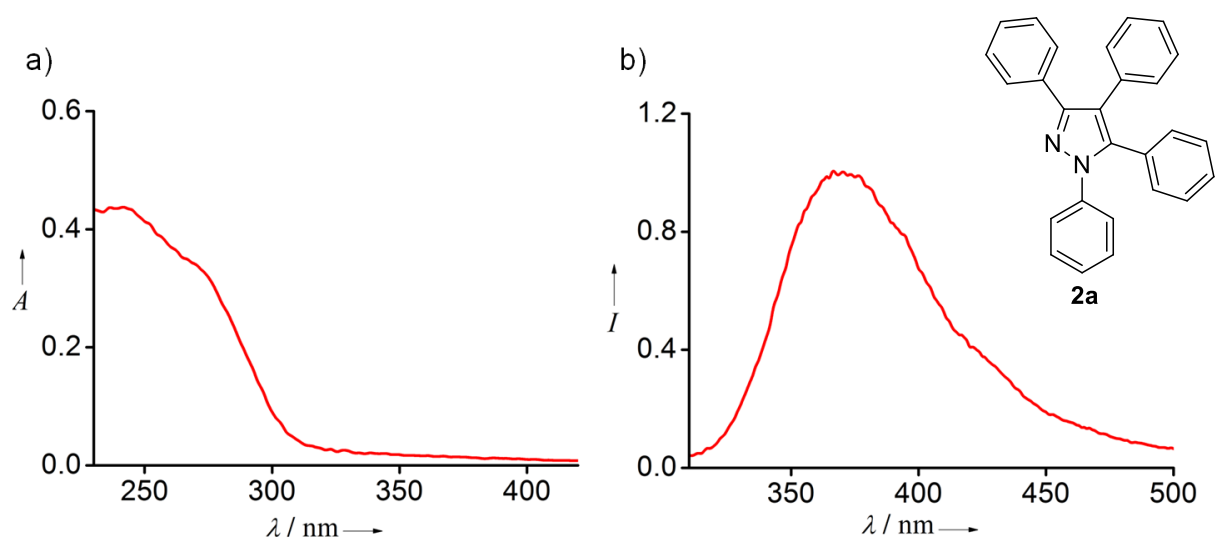

**Figure S1:** Absorption (a) and emission (b) spectrum of **2a** in acetonitrile

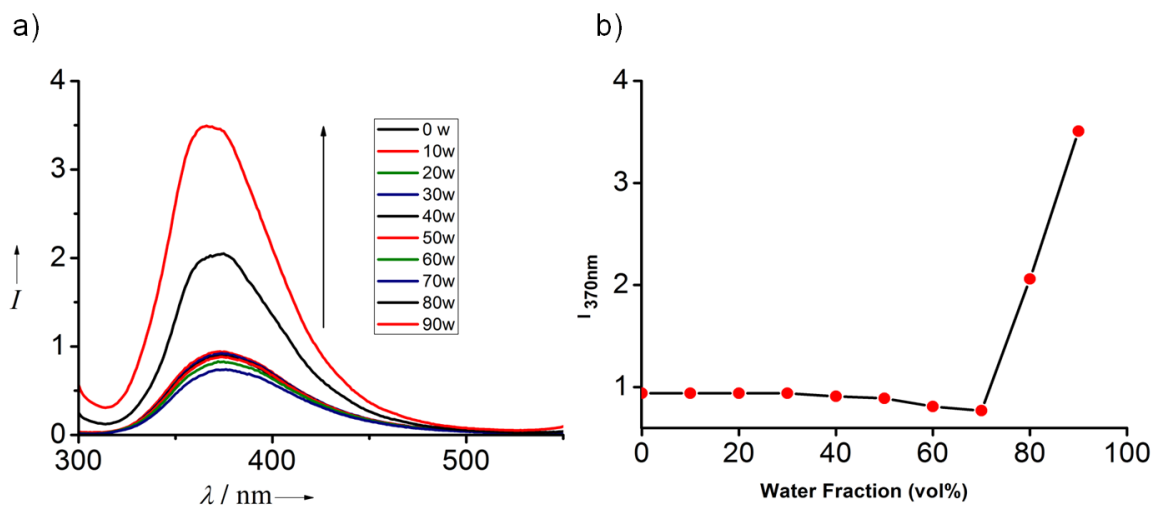

**Figure S2:** (a) Emission spectra of **2a** in acetonitrile/water mixtures with increasing addition of water ( $f_w = 0-90$  vol%). (b) The changes in the emission intensity of **2a** with the water contents in the acetonitrile/water mixture.

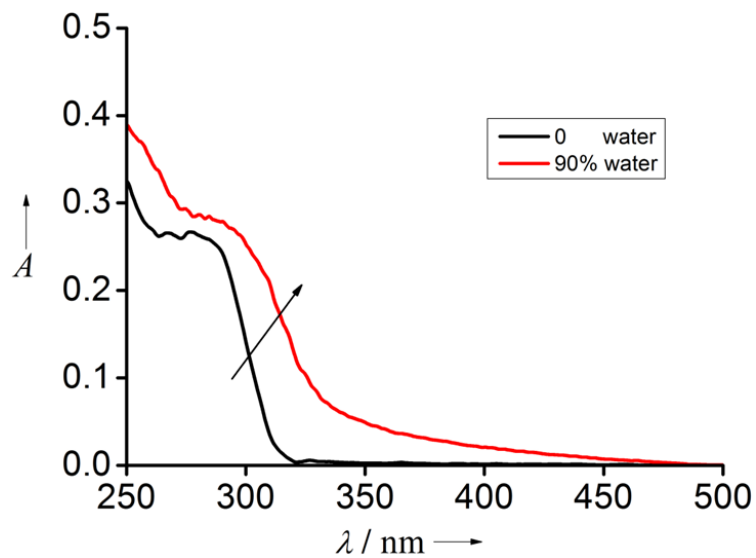

**Figure S3:** Absorption spectra of **2a** in acetonitrile ( $f_w = 0$  vol%) and acetonitrile/water mixture ( $f_w = 90$  vol%)

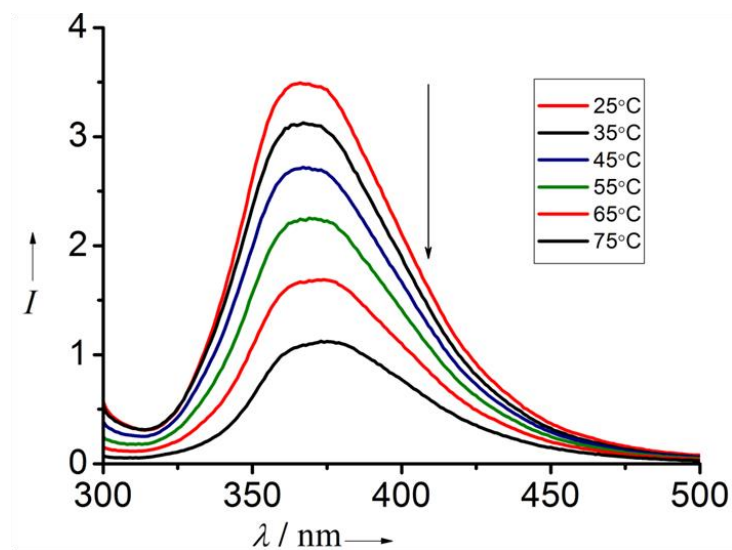

**Figure S4:** Temperature effect on the emission intensity of **2a** in acetonitrile/water (1:9 v/v), ( $\lambda_{\text{ex}} = 280$  nm)

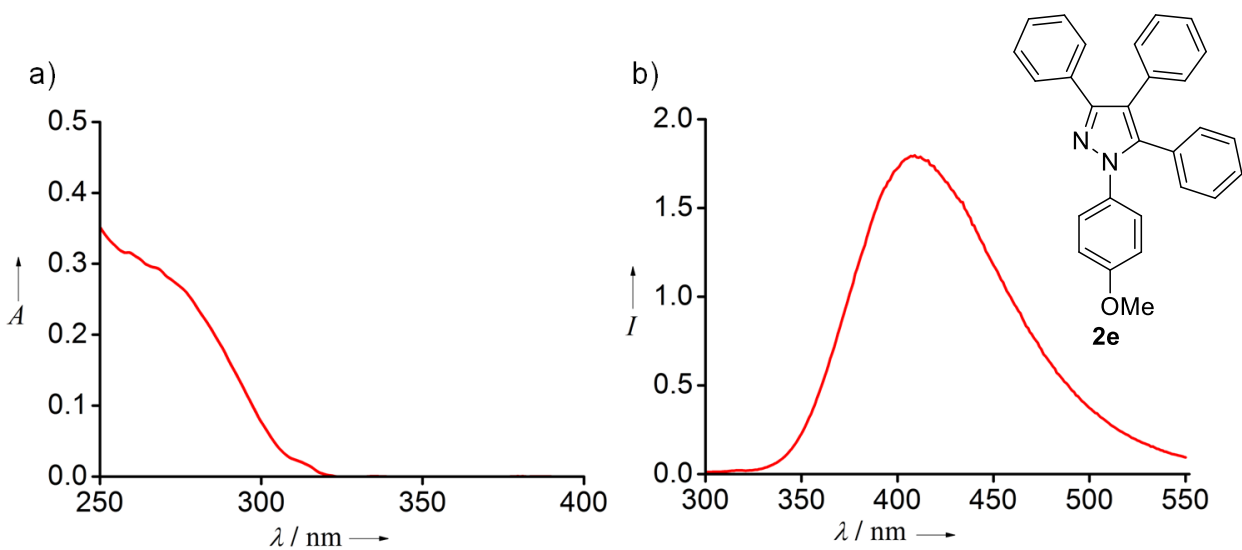

**Figure S5:** Absorption (a) and emission (b) spectrum of **2e** in acetonitrile

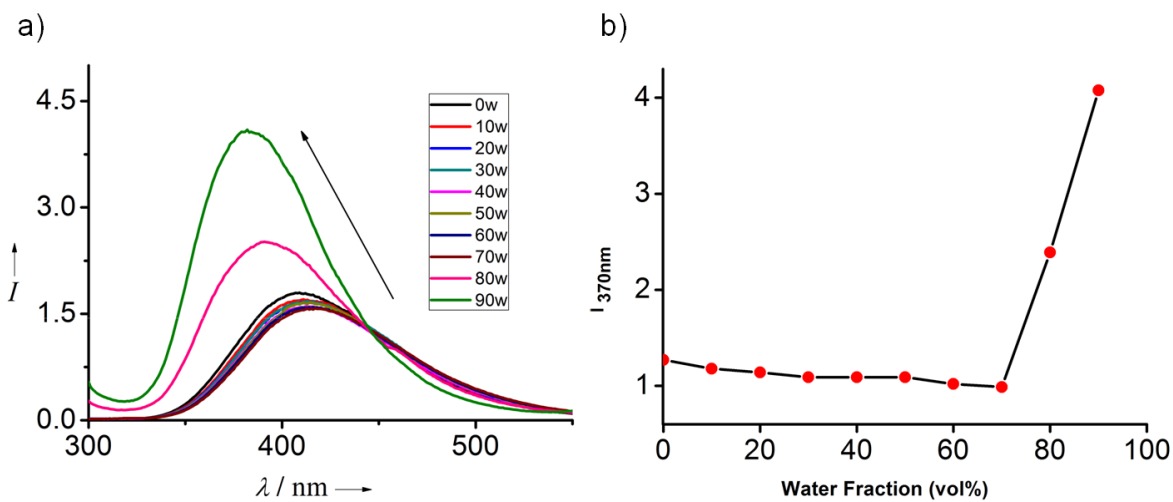

**Figure S6:** (a) Emission spectra of **2e** in acetonitrile/water mixtures with increasing addition of water ( $f_w=0-90$  vol%). (b) The changes in the emission intensity of **2e** with the water contents in the acetonitrile/water mixture.



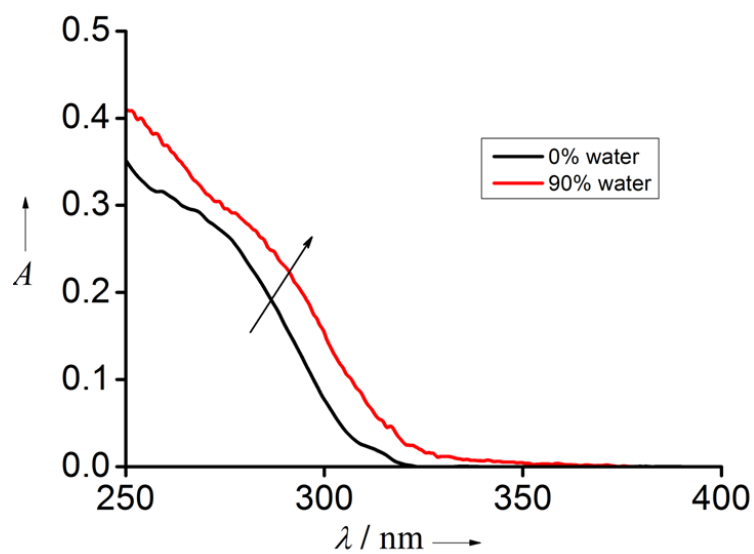

**Figure S7:** Absorption spectra of **2e** in acetonitrile ( $f_w = 0$  vol%) and acetonitrile/water mixture ( $f_w = 90$  vol%)

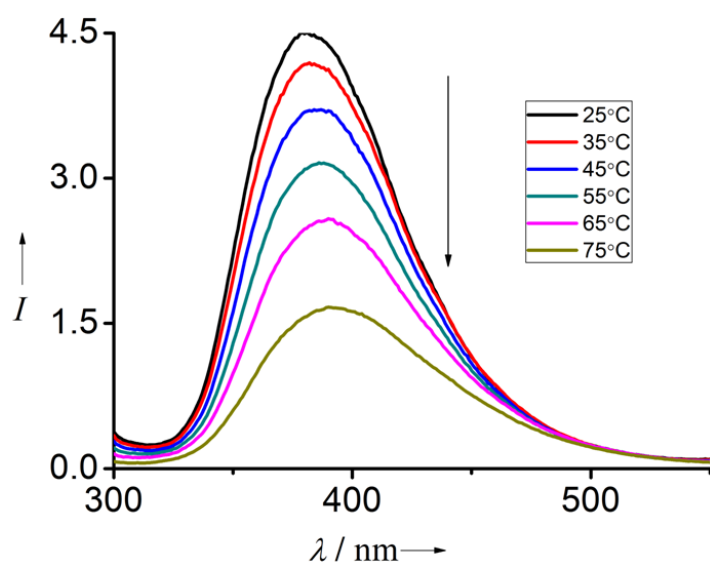

**Figure S8:** Temperature effect on the emission intensity of **2e** in acetonitrile/water (1:9 v/v), ( $\lambda_{ex} = 280$  nm)

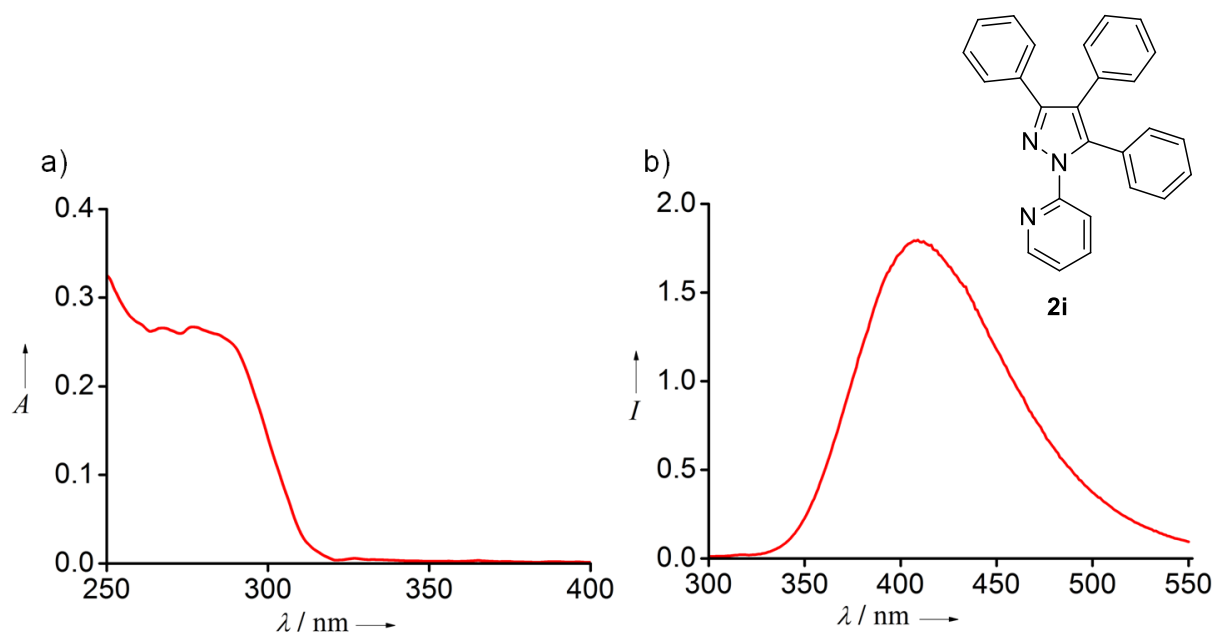

**Figure S9:** Absorption (a) and emission (b) spectrum of **2i** in acetonitrile

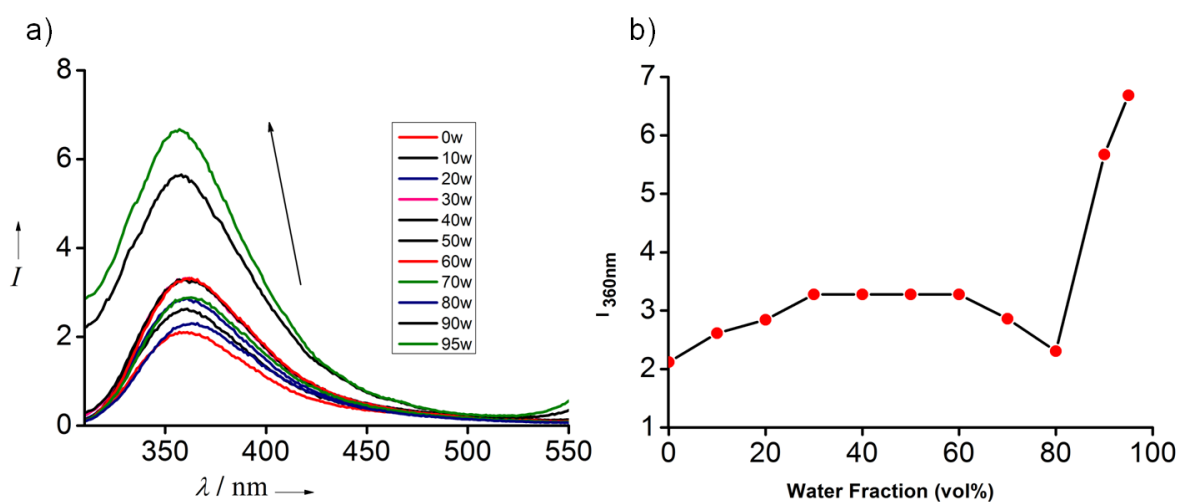

**Figure S10:** (a) Emission spectra of **2i** in acetonitrile/water mixtures with increasing addition of water ( $f_w=0-95$  vol%). (b) The changes in the emission intensity of **2i** with the water contents in the acetonitrile/water mixture.

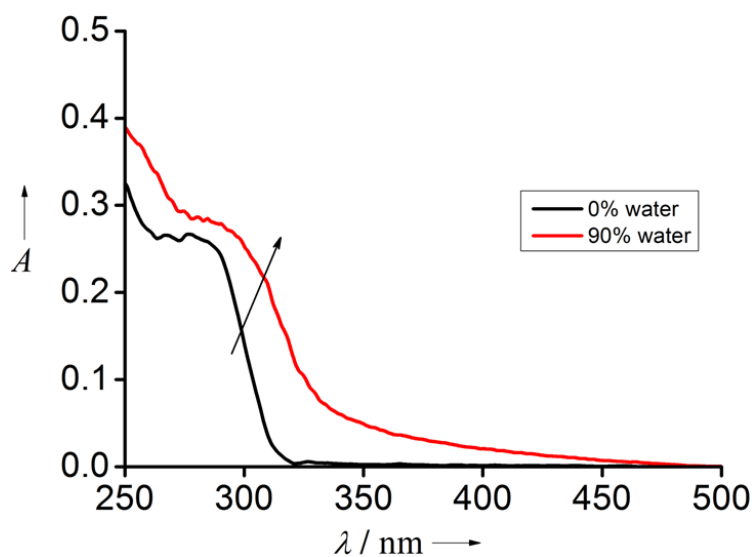

**Figure S11:** Absorption spectra of **2i** in acetonitrile ( $f_w=0$  vol%) and acetonitrile/water mixture ( $f_w=90$  vol%)

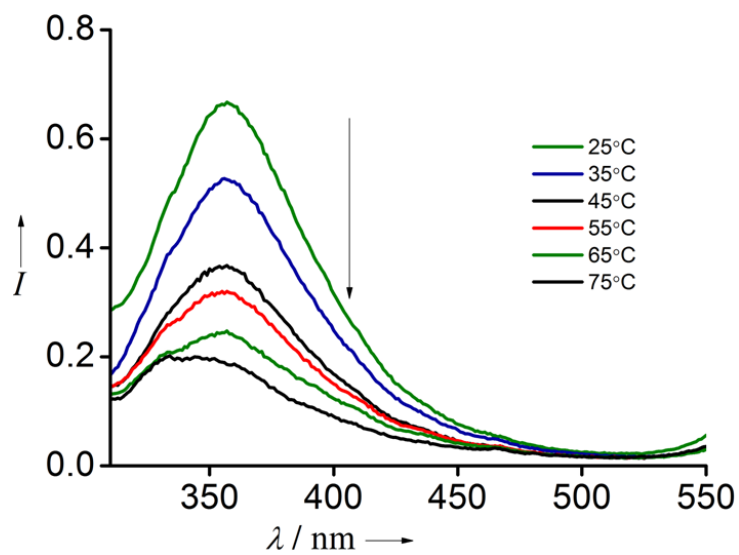

**Figure S12:** Temperature effect on the emission intensity of **2i** in acetonitrile/water (1:9 v/v), ( $\lambda_{\text{ex}}=280$  nm)

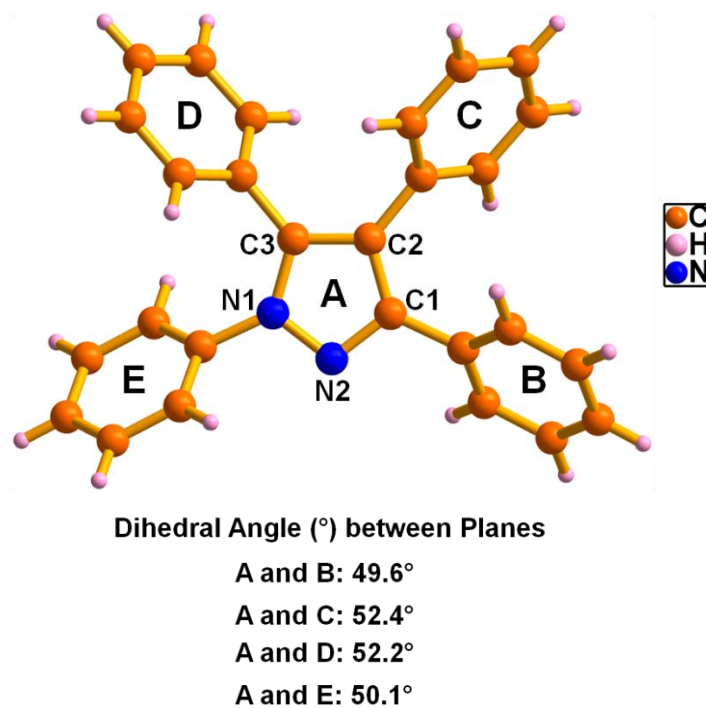

**Figure S13:** Single crystal X-ray structure of **2a** with the dihedral angle between the planes.

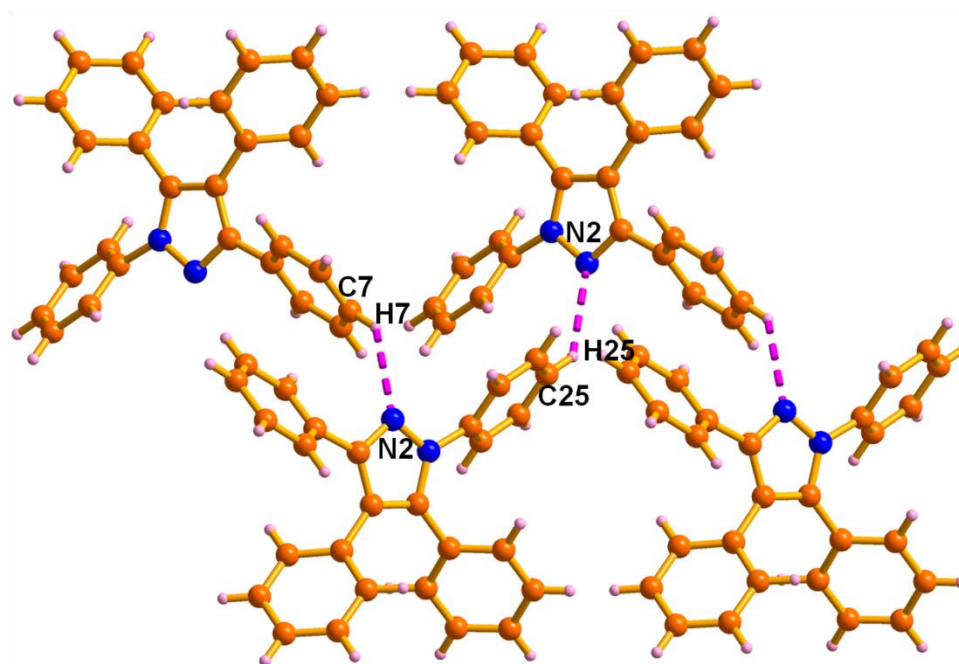

**Figure S14:** 1-D array in **2a**. The array is formed between one of the phenyl-CHs (C7-H7; C25-H25) with two different units of pyrazole nitrogens (N2) with the bond distances and angles of C7-H7...N2 and C25-H25...N2 are 2.78 Å;  $141^{\circ}$  and 2.80 Å;  $140^{\circ}$ .

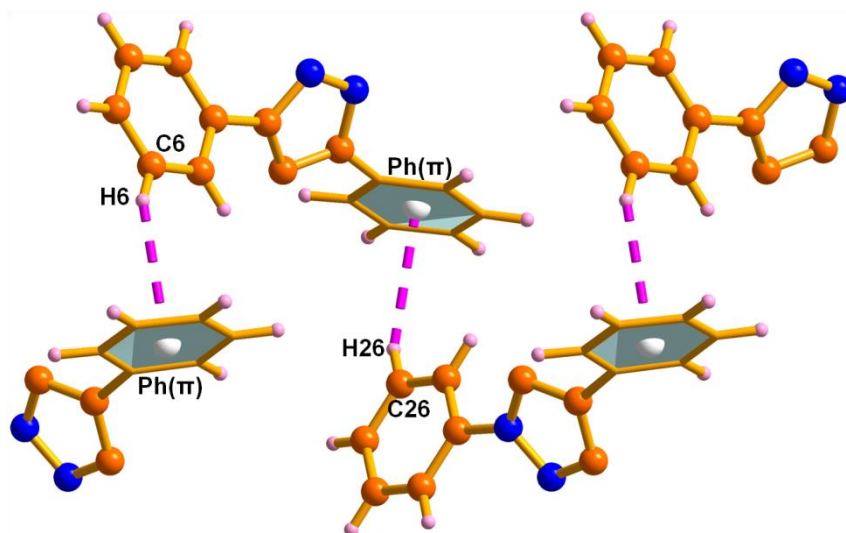

**Figure S15:** 1-D array in **2a**. The array is formed between one of the phenyl-CHs (C6-H6) and N-phenyl-CH (C26-H26) unit with two different phenyl  $\pi$ -clouds with the bond distances and angles of C6-H6...Ph( $\pi$ ) and C26-H26...Ph( $\pi$ ) are: 3.00 Å and 144°.

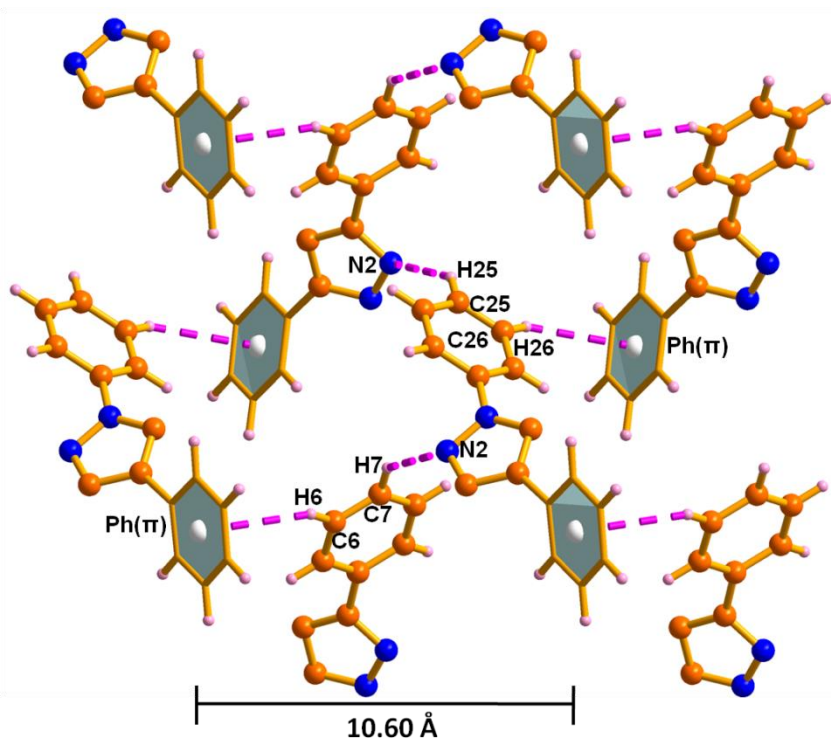

**Figure S16:** 2-D array in **2a**. The  $\pi - \pi$  distance between two closely packed molecules is 10.60Å. The bond distance and angles of C7-H7...N2; C25-H25...N2; C6-H6...Ph( $\pi$ ) and C26-H26...Ph( $\pi$ ) are 2.78 Å & 141°; 2.80Å & 140° and 3.00 Å & 144°.

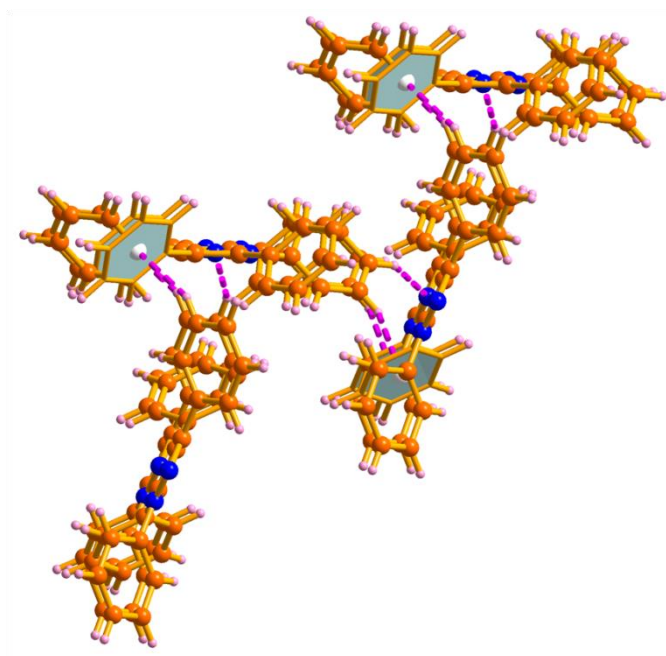

**Figure S17:** Crystal packing in **2a**.

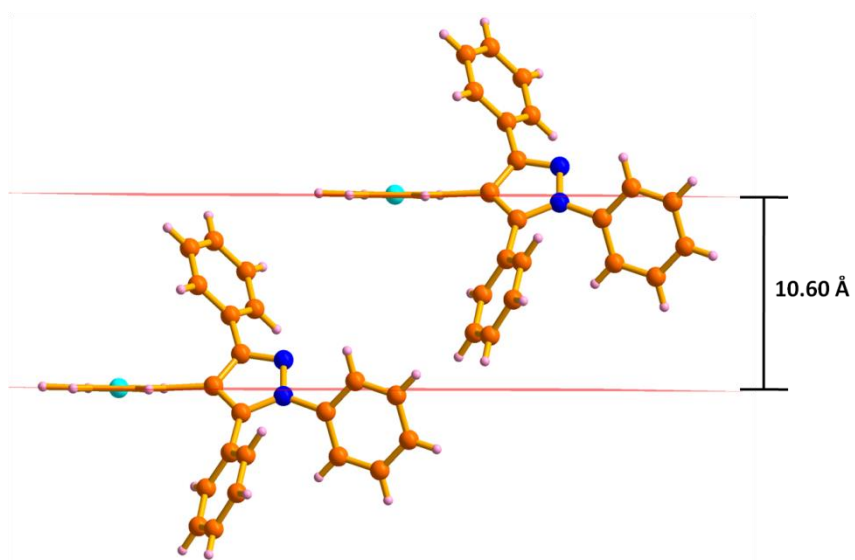

**Figure S18:** The  $\pi - \pi$  distance between two closely packed molecules in **2a** is 10.60 Å.

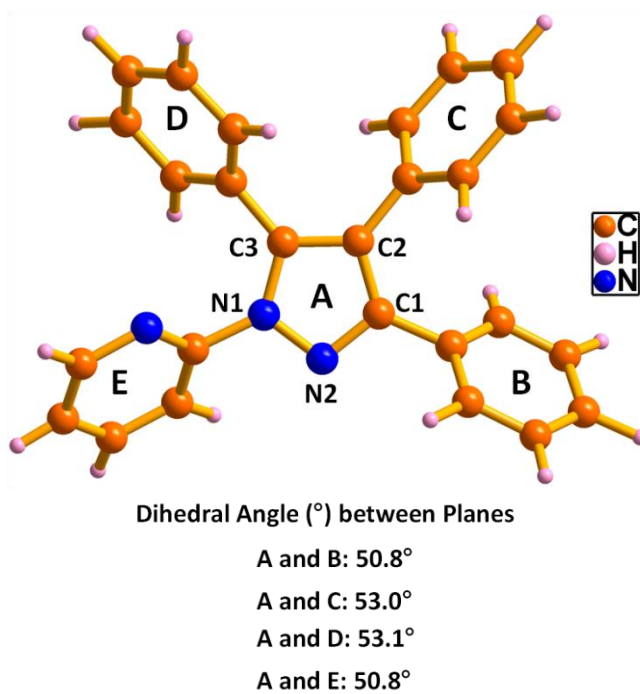

**Figure S19:** Single crystal X-ray structure of **2i** with the dihedral angle between the planes.

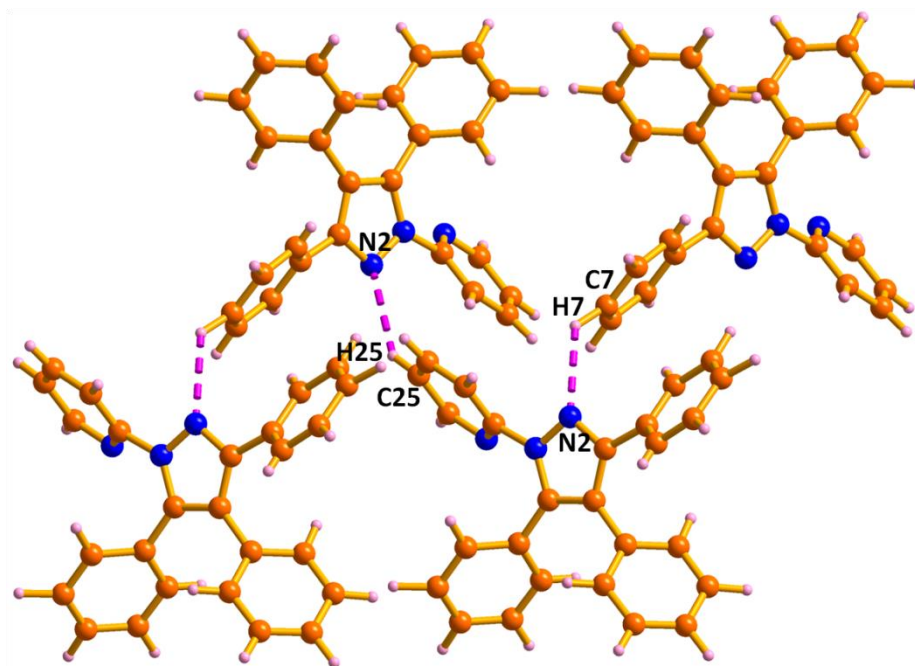

**Figure S20:** 1-D array in **2i**. The array is formed between one of the phenyl-CHs (C7-H7; C25-H25) with two different units of pyrazole nitrogens (N2) with the bond distances and angles of C7-H7...N2 and C25-H25...N2 are  $2.66 \text{ \AA}$ ;  $133^{\circ}$  and  $2.70 \text{ \AA}$ ;  $145^{\circ}$ .



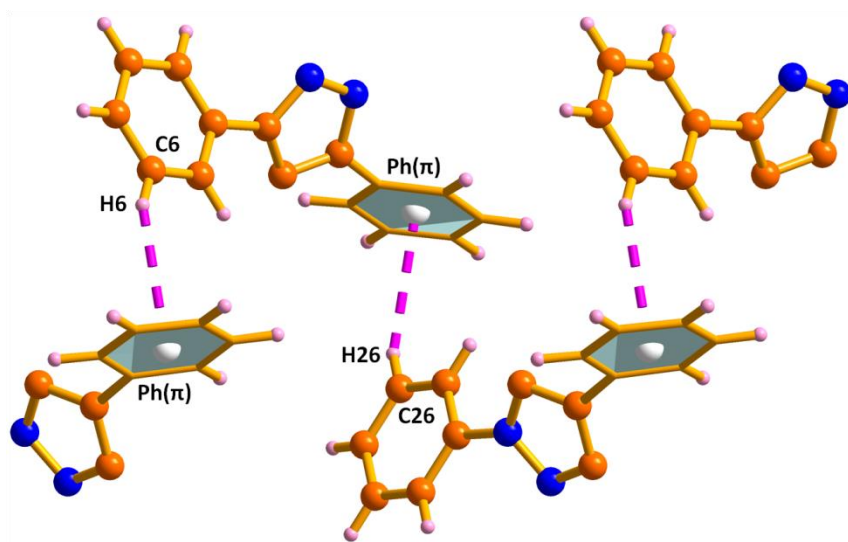

**Figure S21:** 1-D array in **2i**. The array is formed between one of the phenyl-CHs (C6-H6) and N-phenyl-CH (C26-H26) unit with two different phenyl  $\pi$ -clouds with the bond distances and angles of C6-H6...Ph( $\pi$ ) and C26-H26...Ph( $\pi$ ) are 3.05 Å; 144° and 2.92 Å; 145°.

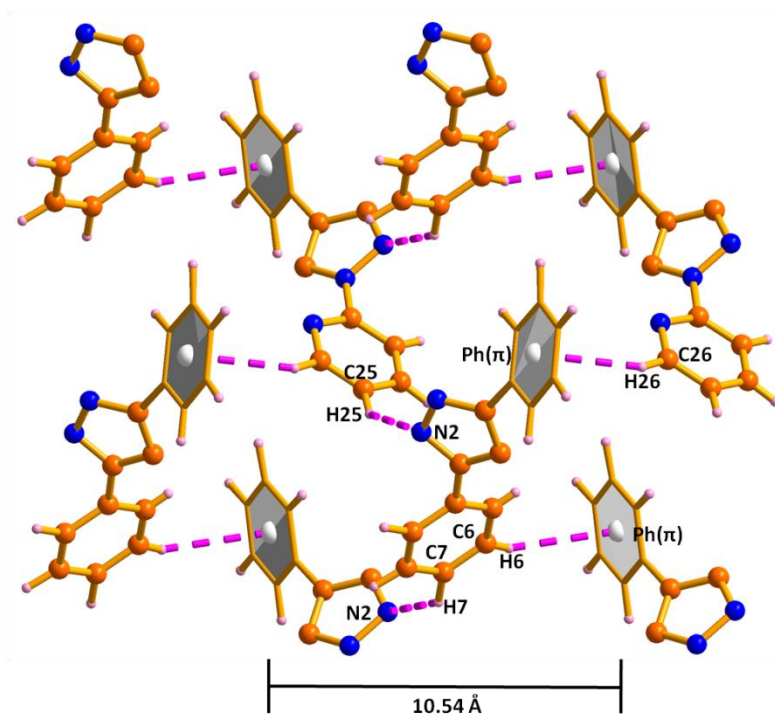

**Figure S22:** 2-D array in **2i**. The  $\pi - \pi$  distance between two closely packed molecules is 10.54Å. The bond distances and angles of C7-H7...N2; C25-H25...N2; C6-H6...Ph( $\pi$ ) and C26-H26...Ph( $\pi$ ) are 2.66 Å & 133°; 2.70Å & 145°; 3.05 Å &144° and 2.92 Å & 145°.



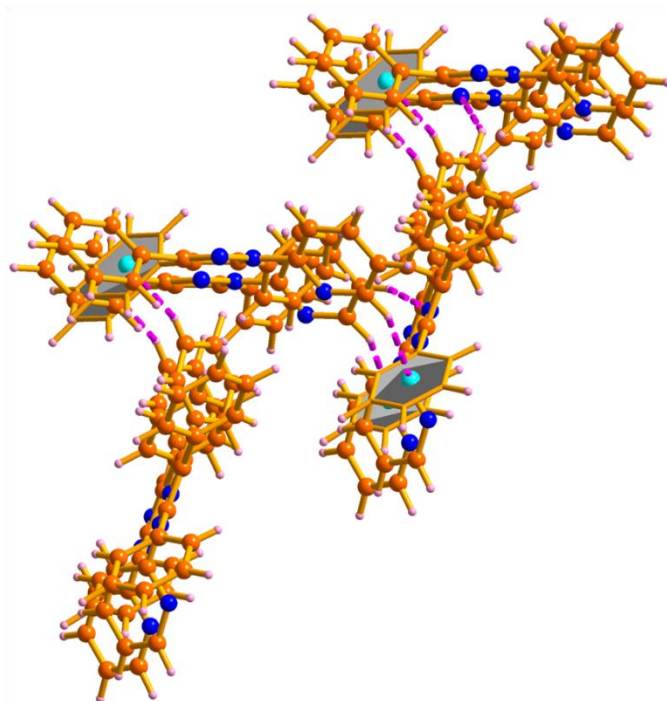

**Figure S23:** Crystal packing in **2a**.

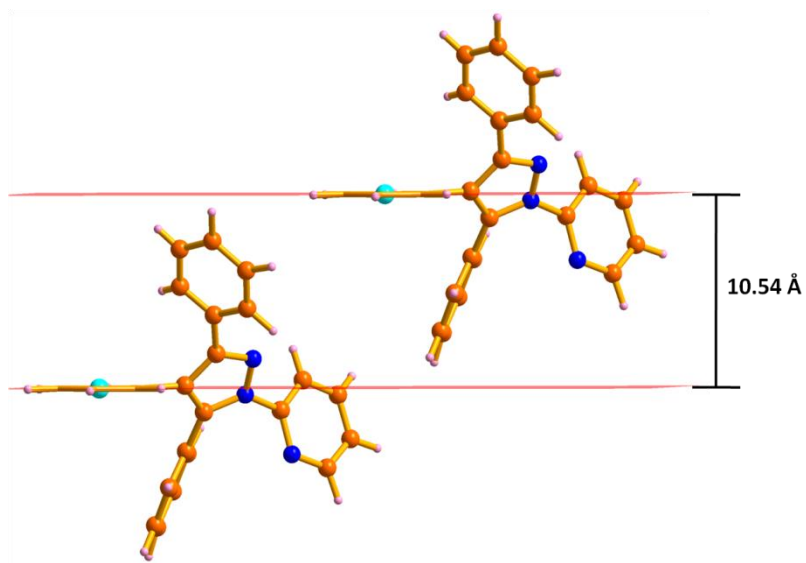

**Figure S24:** The  $\pi$  -  $\pi$  distance between two closely packed molecules in **2i** is 10.54 Å.

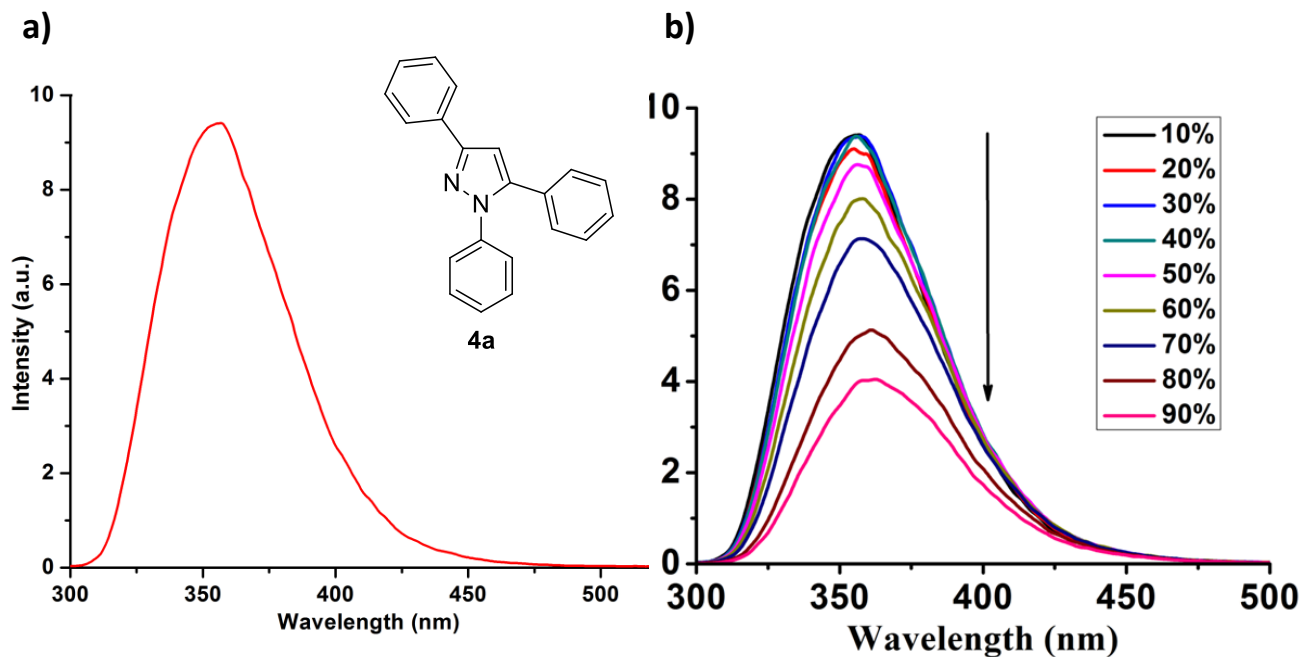

**Figure S25:** a) Emission spectra of **4a** in acetonitrile, b) Emission spectra of **4a** in acetonitrile /water mixtures with increasing addition of water ( $f_w=0-90$  vol%).

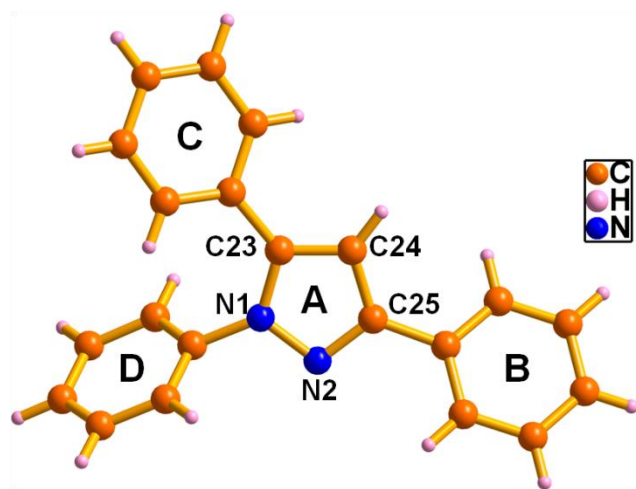

Dihedral Angle ( $^{\circ}$ ) between Planes

A and B:  $33.6^{\circ}$

A and C:  $29.5^{\circ}$

A and D:  $64.1^{\circ}$

**Figure S26:** Single crystal X-ray structure of **4a** with the dihedral angle between the planes.

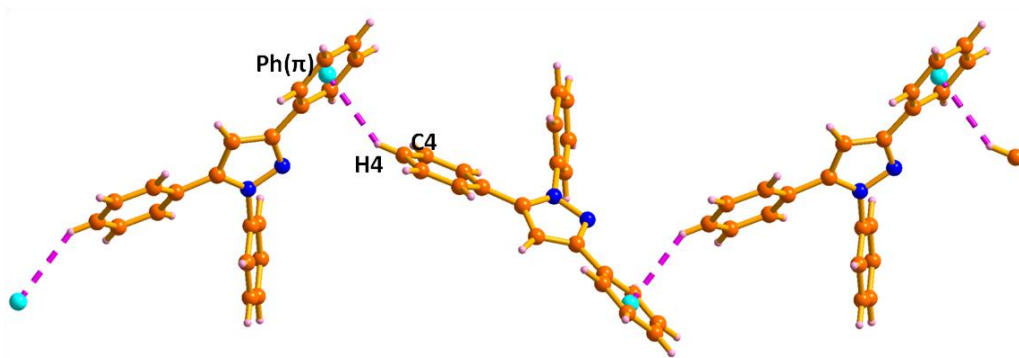

**Figure S27** 1-D array in **4a**. The array is formed between one of the phenyl-CHs (C4-H4) and second pyrazole unit phenyl  $\pi$ -cloud with the bond distance and angle of C4-H4...Ph( $\pi$ ) is: 2.88 Å and 147°.

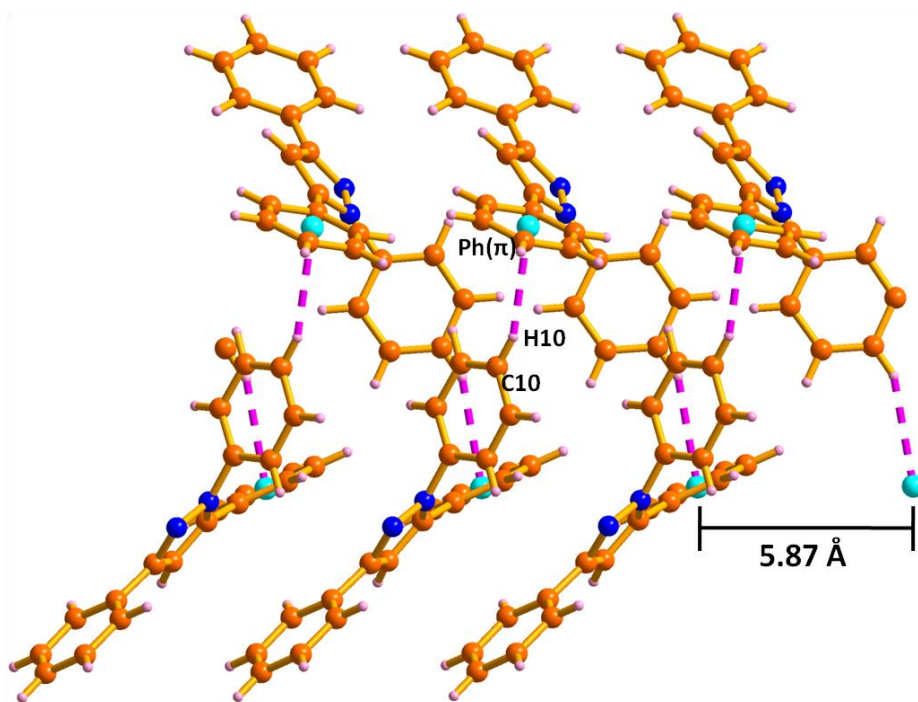

**Figure S28:** 1-D array in **4a**. The array is formed between one of the pyrazole N-phenyl-CHs (C10-H10) and second pyrazole unit phenyl  $\pi$ -cloud with the bond distance and angle of C10-H10...Ph( $\pi$ ) is: 2.88 Å and 156°. The  $\pi$  -  $\pi$  distance between two closely packed molecules is 5.87 Å.

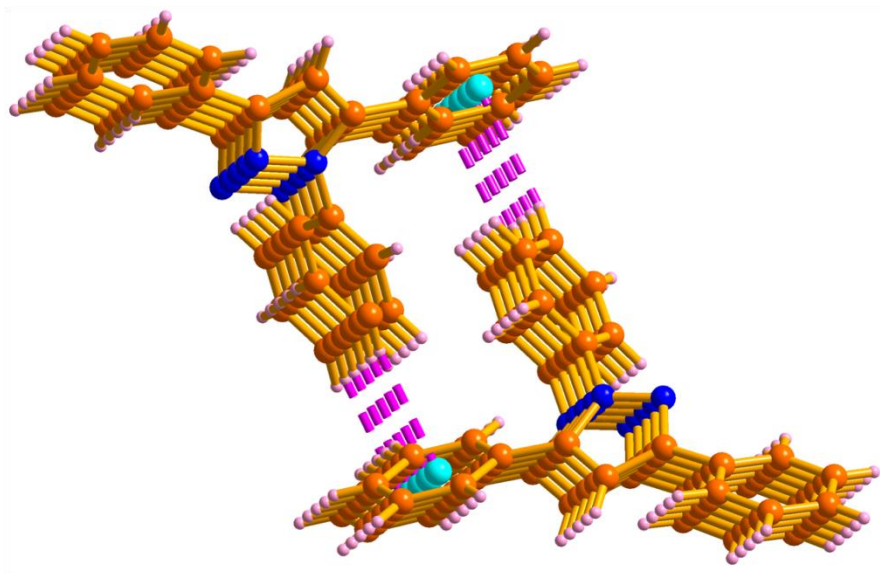

**Figure S29:** Crystal packing in **4a**.

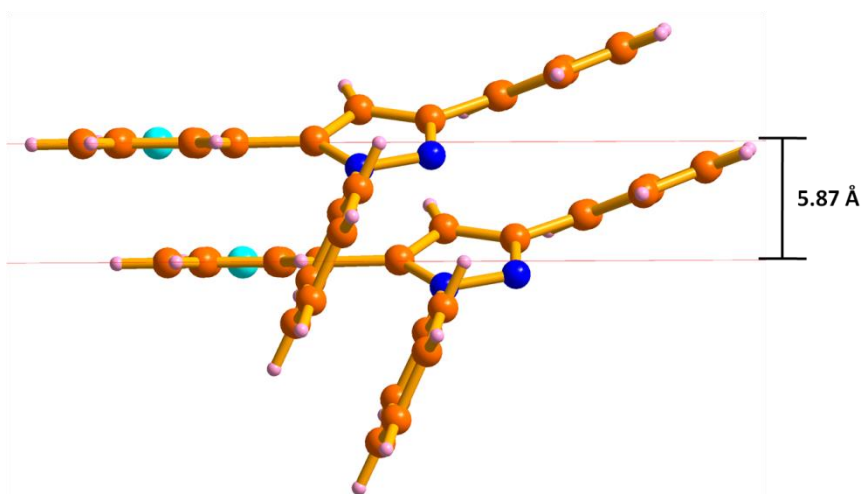

**Figure S30:** The  $\pi - \pi$  distance between two closely packed molecules in **4a** is 5.87 Å.

### Crystallographic data of **2a**, **2i** and **4a**:

Crystallographic data of **2a** in CH<sub>2</sub>Cl<sub>2</sub>/*n*-hexane: C<sub>27</sub>H<sub>20</sub>N<sub>2</sub>, Mw = 372.45, monoclinic, space group P2<sub>1</sub>, a = 9.9297(3) Å, b = 9.6354(3) Å, c = 10.6037(3) Å, α = 90.00°, β = 90.080(2)°, γ = 90.00°, V = 1014.53(5) Å<sup>3</sup>, Z = 2, D<sub>calc</sub> = 1.219 mg/m<sup>3</sup>, T = 296(2) K, R<sub>1</sub> = 0.0443 {I > 2σ(I)}, R<sub>2w</sub> = 0.1085, GOF = 1.038.

Crystallographic data of **2i** in CH<sub>2</sub>Cl<sub>2</sub>/*n*-hexane: C<sub>26</sub>H<sub>19</sub>N<sub>3</sub>, Mw = 373.44, monoclinic, space group P2<sub>1</sub>, a = 9.7331(3) Å, b = 9.7771(3) Å, c = 10.5392(3) Å, α = 90.00°, β = 90.204(2)°, γ = 90.00°, V = 1002.92(5) Å<sup>3</sup>, Z = 2, D<sub>calc</sub> = 1.237 mg/m<sup>3</sup>, T = 296(2) K, R<sub>1</sub> = 0.0431 {I > 2σ(I)}, R<sub>2w</sub> = 0.1021, GOF = 1.002.

Crystallographic data of **4a** in CH<sub>2</sub>Cl<sub>2</sub>/*n*-hexane: C<sub>21</sub>H<sub>16</sub>N, Mw = 296.36, orthorhombic, space group Fdd2, a = 29.627(10) Å, b = 36.790(12) Å, c = 5.865(2) Å, α = 90.00°, β = 90.00°, γ = 90.00°, V = 6393(6) Å<sup>3</sup>, Z = 16, D<sub>calc</sub> = 1.232 mg/m<sup>3</sup>, T = 296(2) K, R<sub>1</sub> = 0.0401 {I > 2σ(I)}, R<sub>2w</sub> = 0.0992, GOF = 0.978.

CCDC-1032189, 1032190 & 1032191 contain the supplementary crystallographic data for **2a**, **2i** and **4a**. These data can be obtained free of charge from the Cambridge Crystallographic Data Centre via [www.ccdc.cam.ac.uk/data\\_request/cif](http://www.ccdc.cam.ac.uk/data_request/cif).

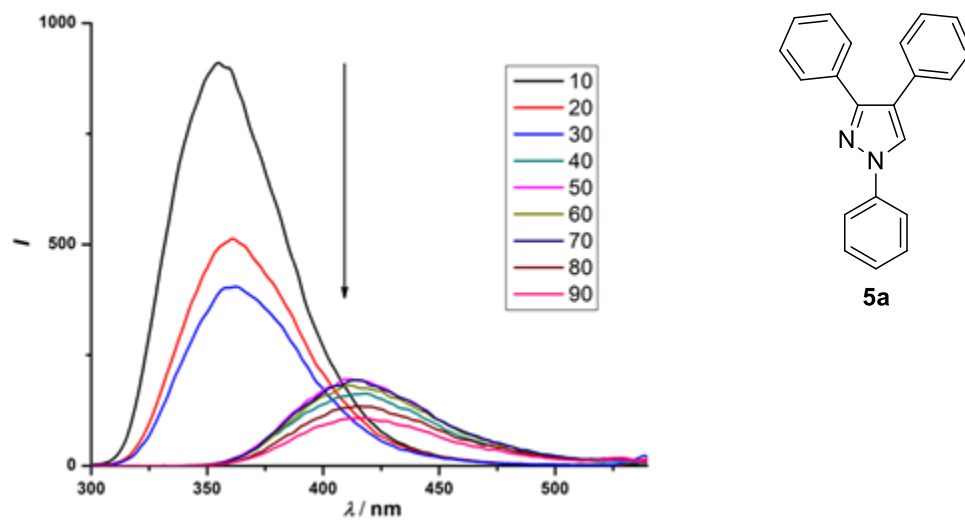

**Figure S31:** (a) Emission spectra of **1,3,4-triphenyl-1H-pyrazole (5a)** in acetonitrile/water mixtures with increasing addition of water ( $f_w=0-90$  vol%).

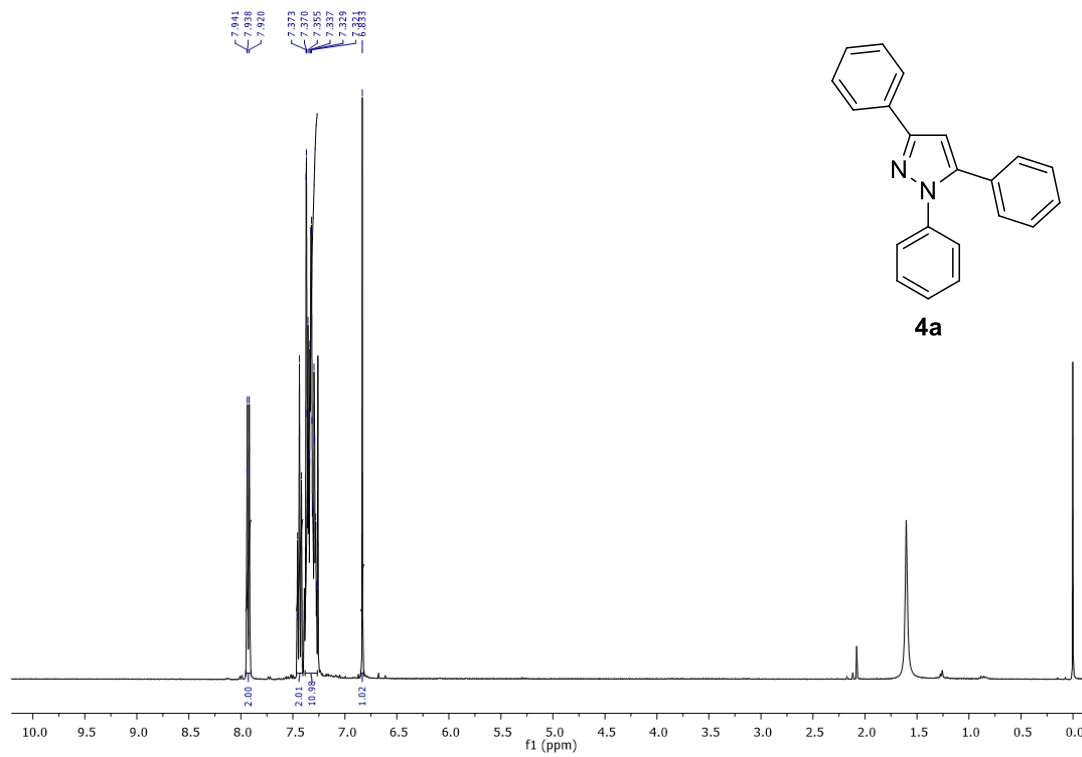

<sup>1</sup>H NMR Spectra of **4a**

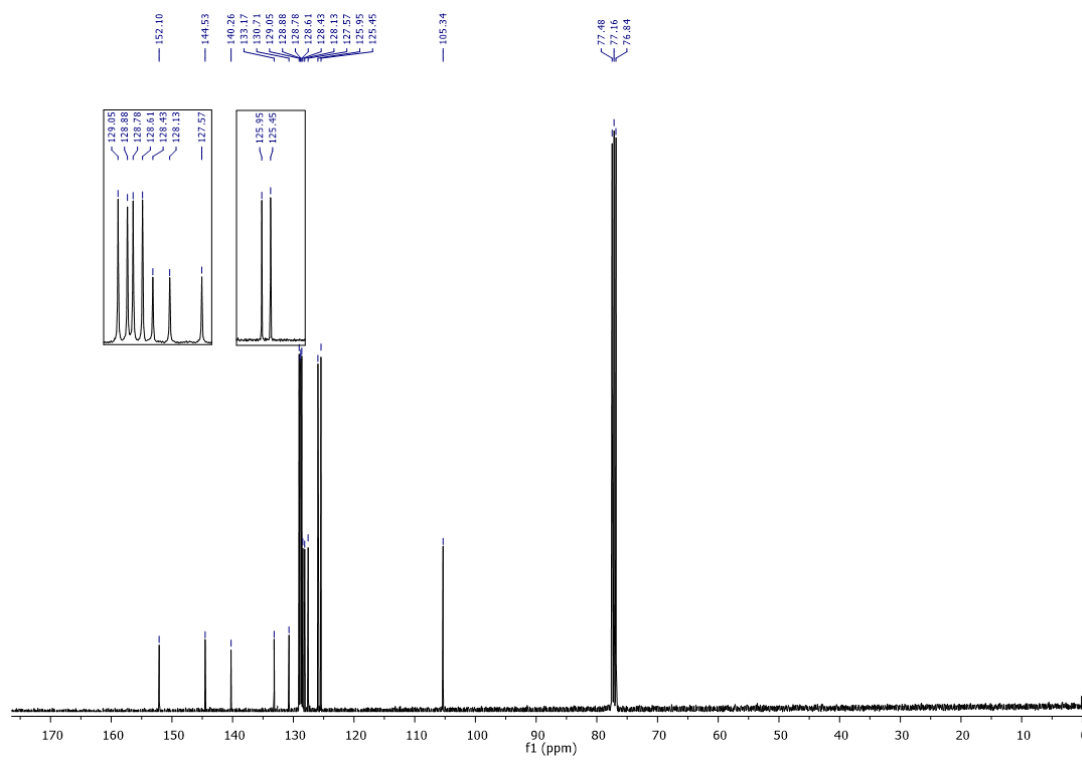

<sup>13</sup>C NMR Spectra of **4a**

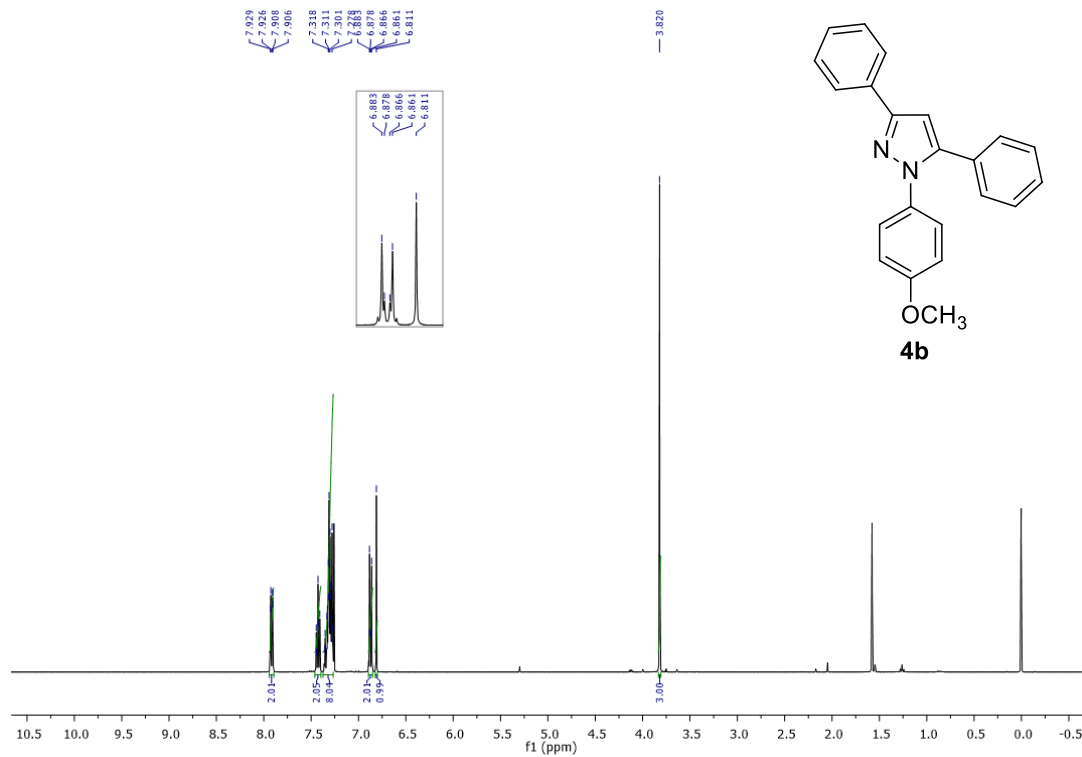

<sup>1</sup>H NMR Spectra of **4b**

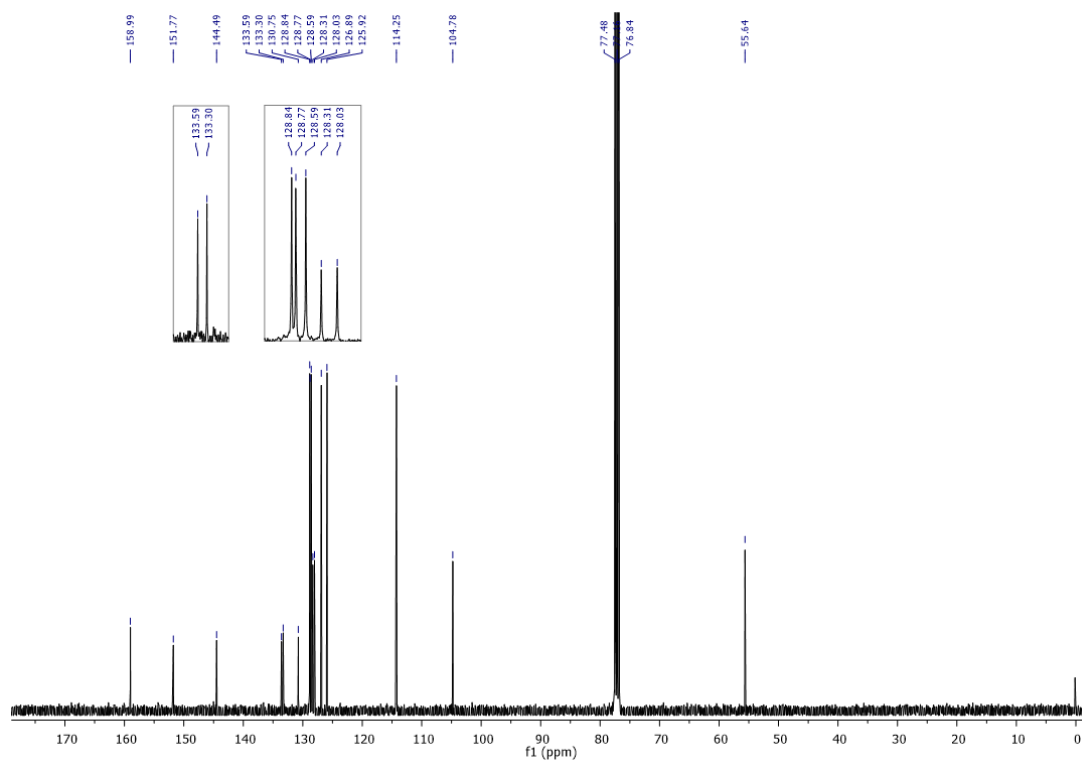

<sup>13</sup>C NMR Spectra of **4b**



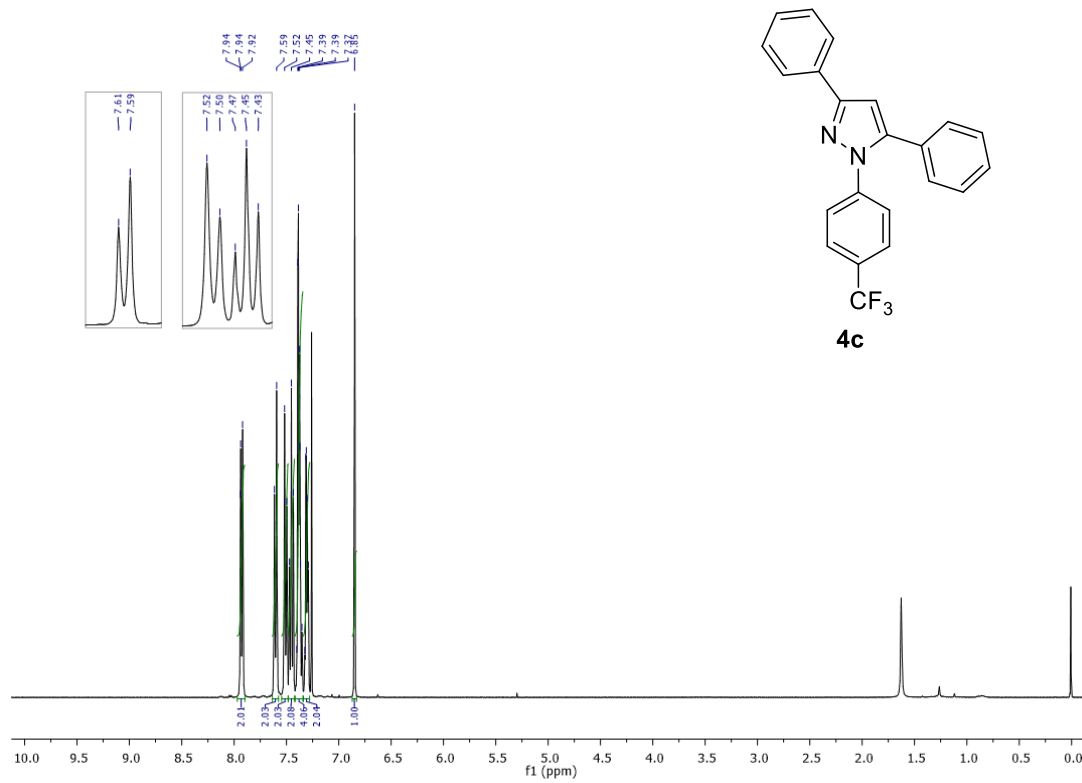

**<sup>1</sup>H NMR Spectra of 4c**

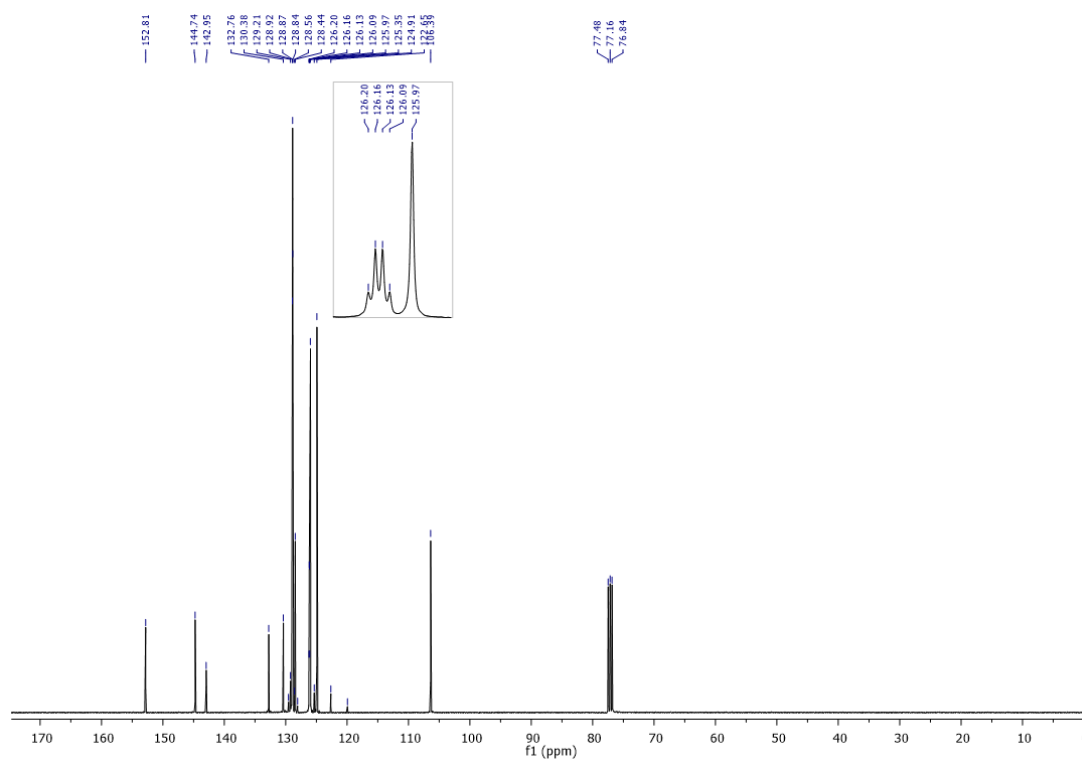

**<sup>13</sup>C NMR Spectra of 4c**

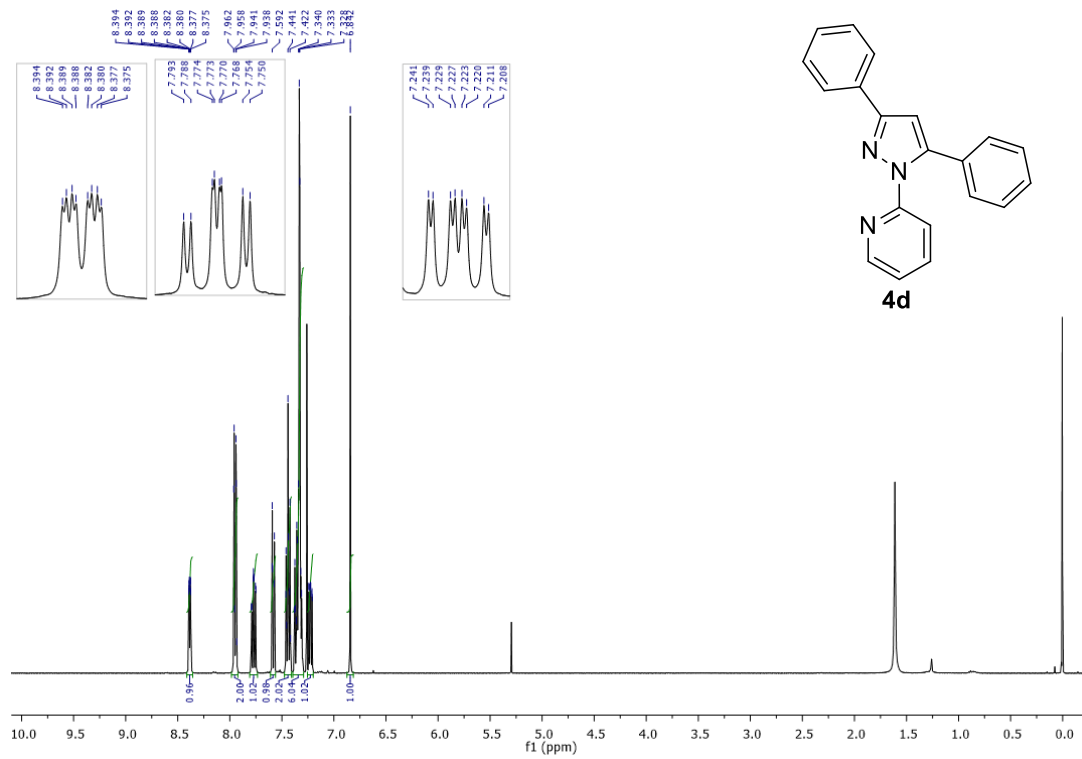

**<sup>1</sup>H NMR Spectra of 4d**

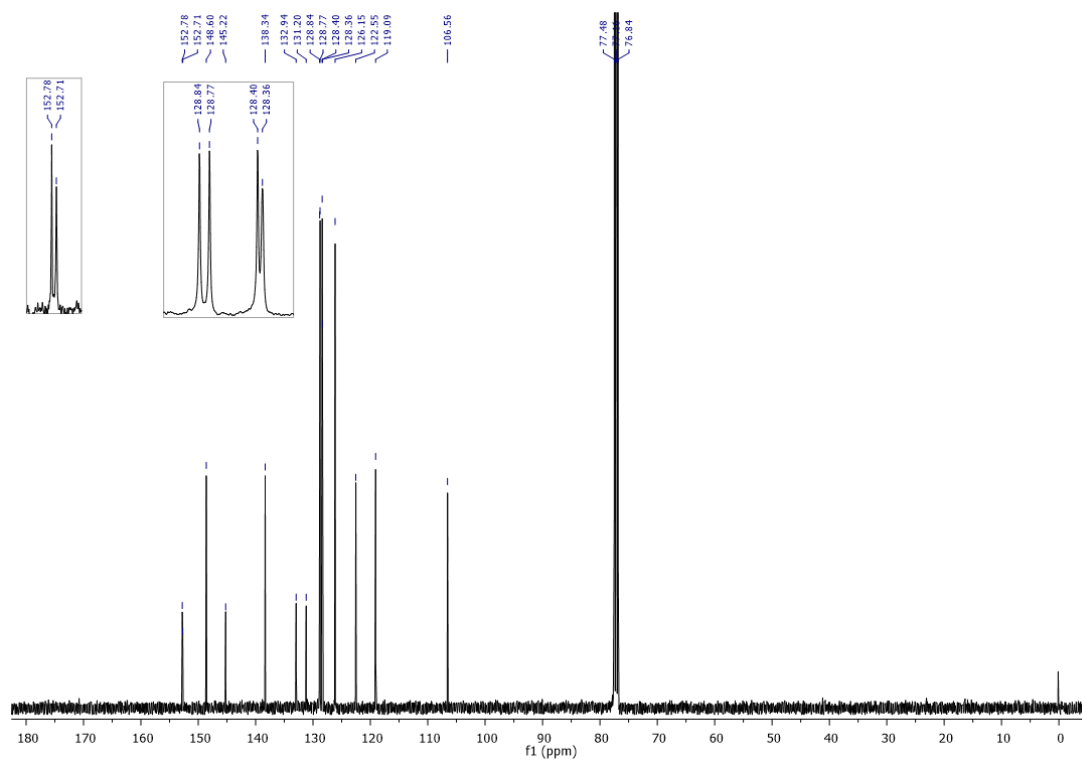

**<sup>13</sup>C NMR Spectra of 4d**

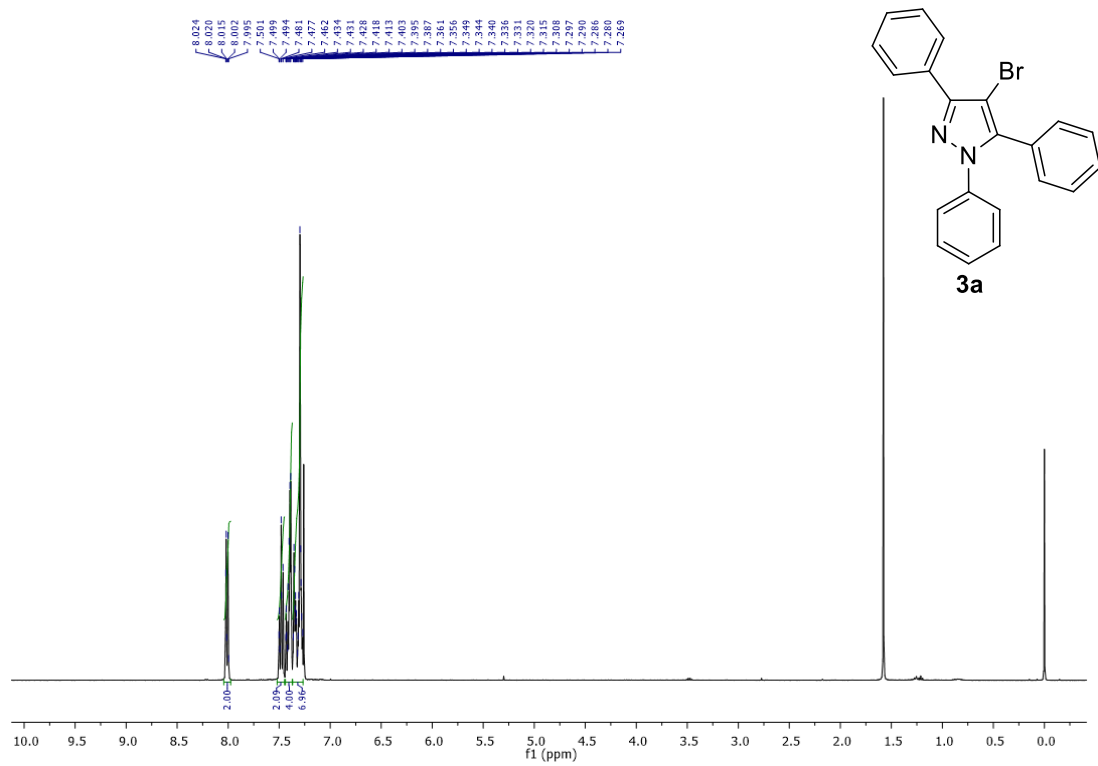

<sup>1</sup>H NMR Spectra of **3a**

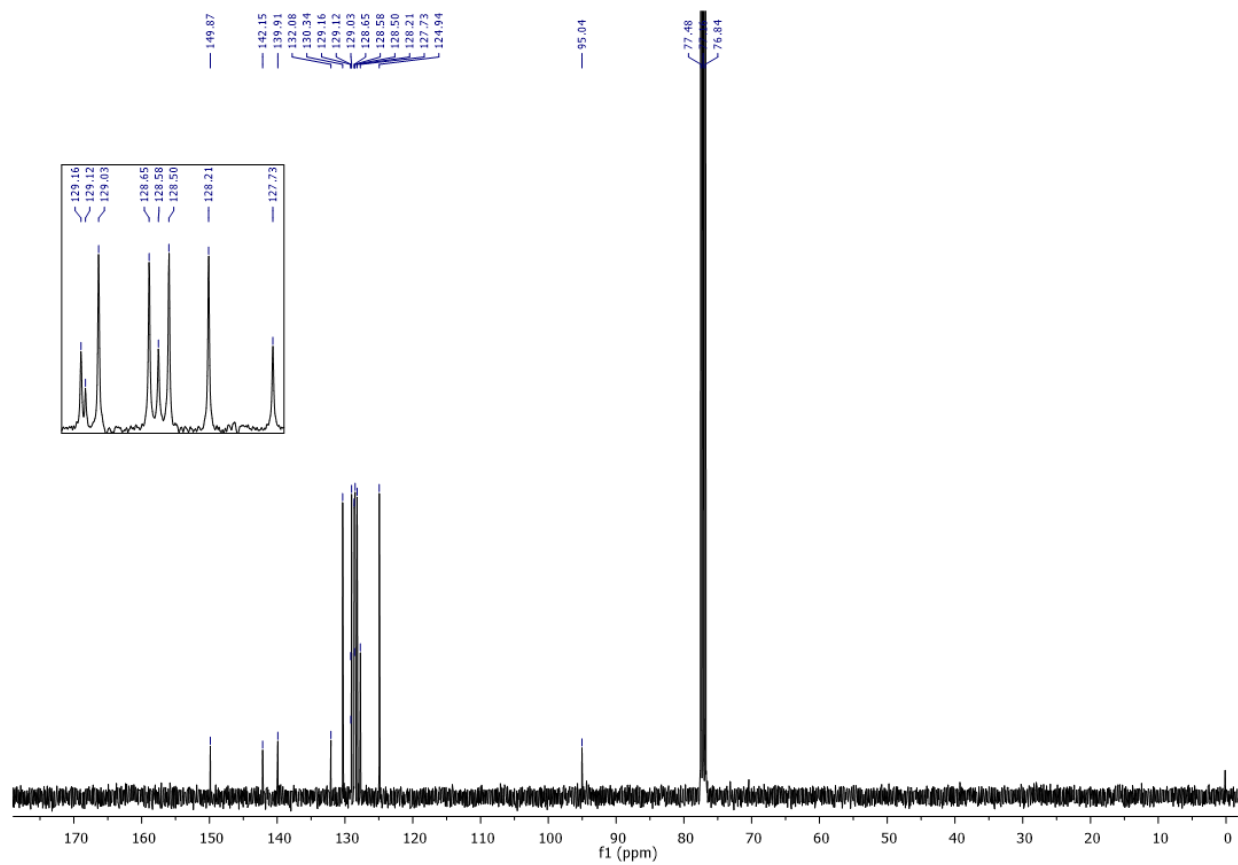

<sup>13</sup>C NMR Spectra of **3a**

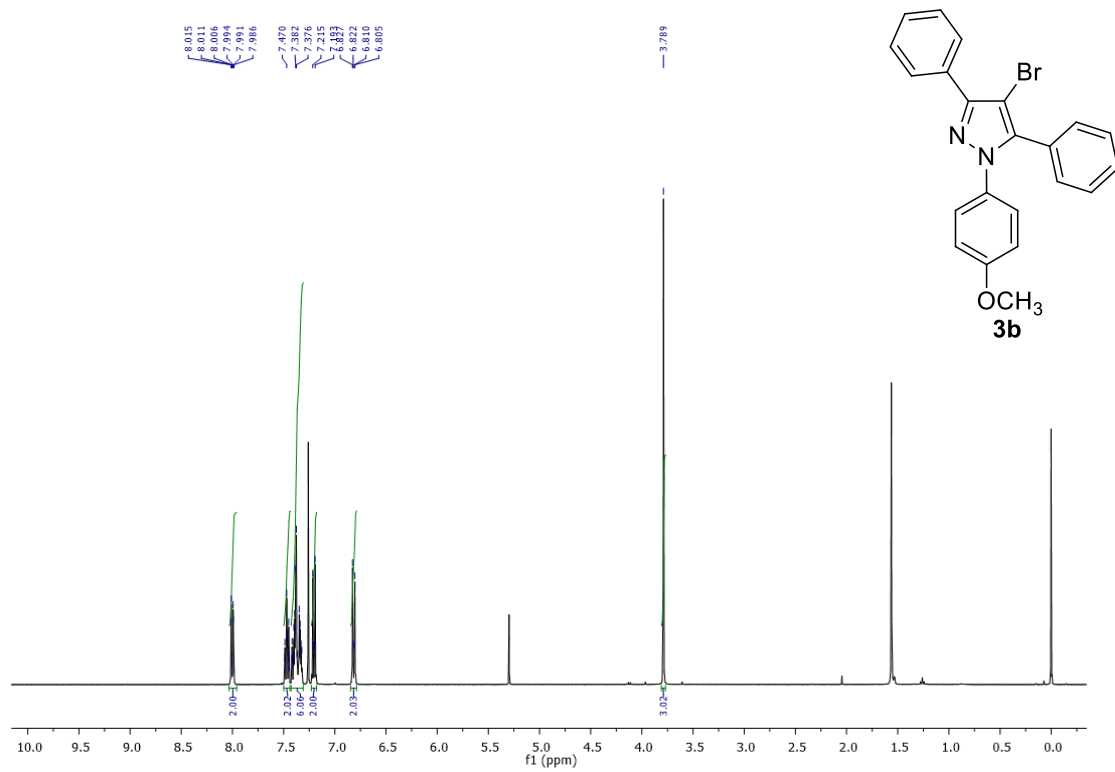

<sup>1</sup>H NMR Spectra of **3b**

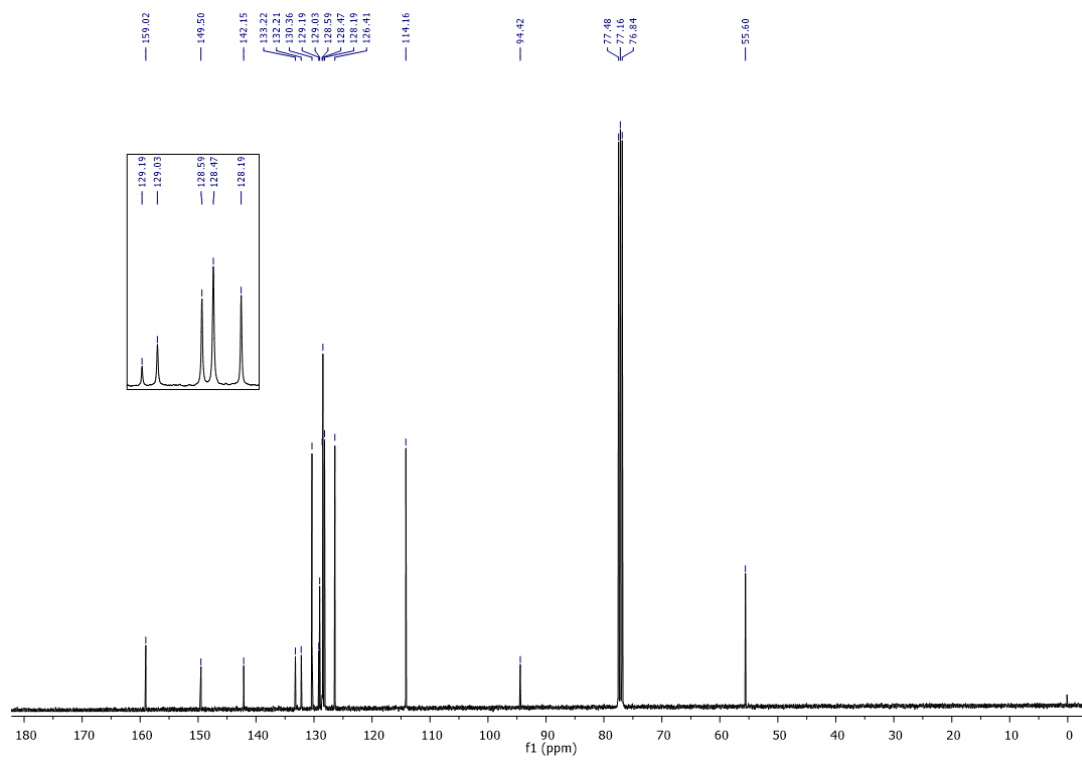

<sup>13</sup>C NMR Spectra of **3b**

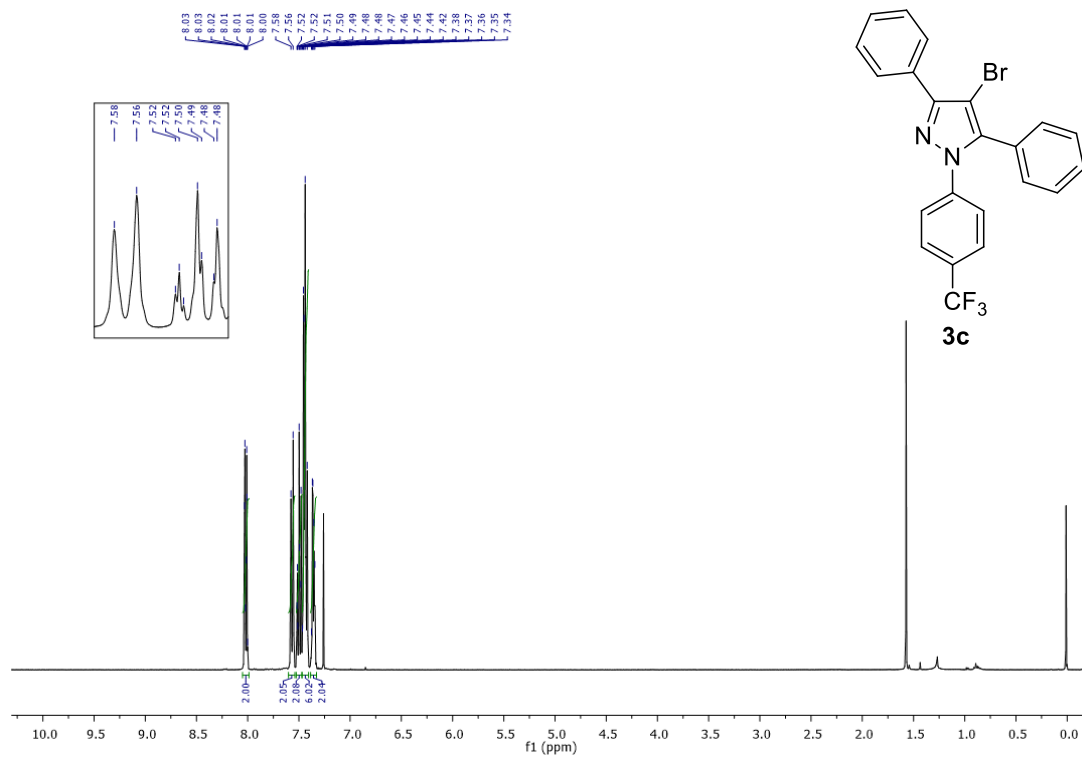

<sup>1</sup>H NMR Spectra of **3c**

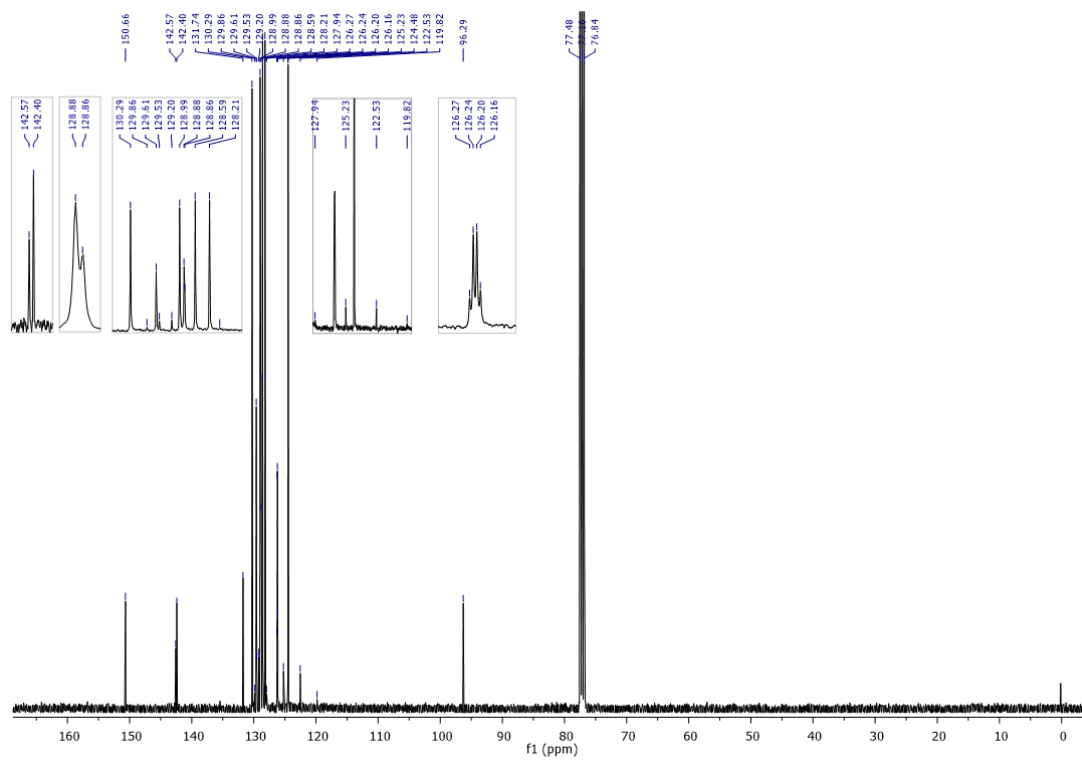

<sup>13</sup>C NMR Spectra of **3c**

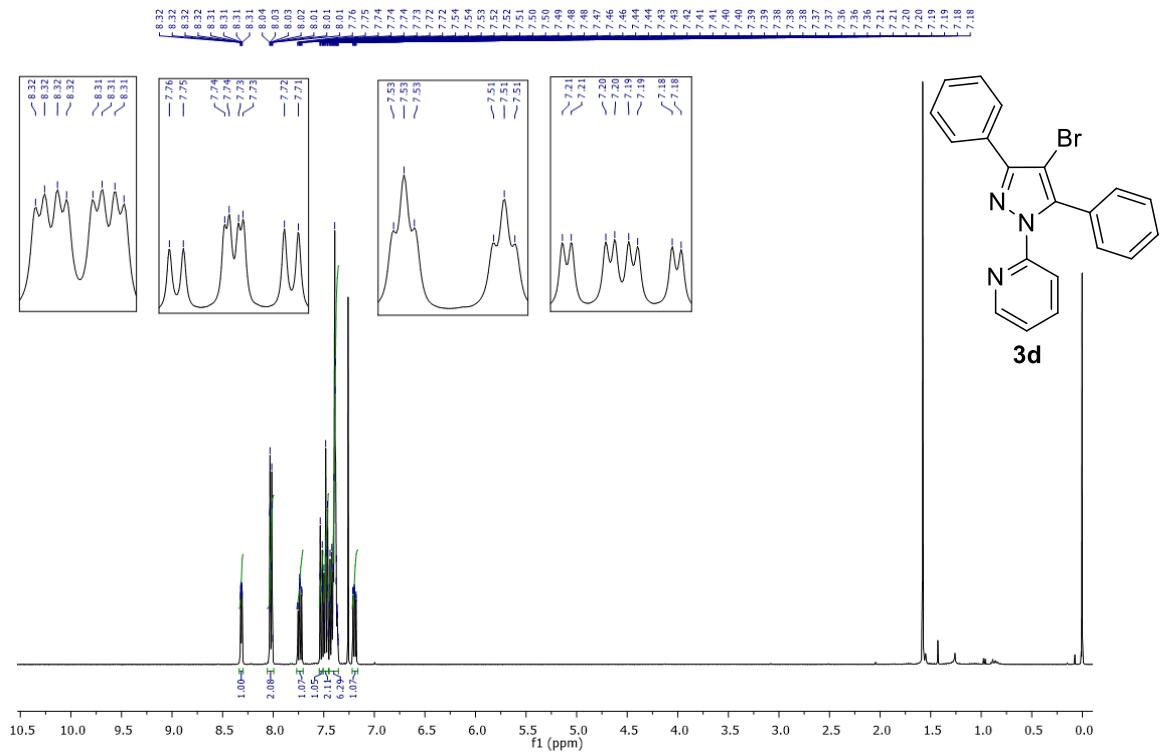

**<sup>1</sup>H NMR Spectra of 3d**

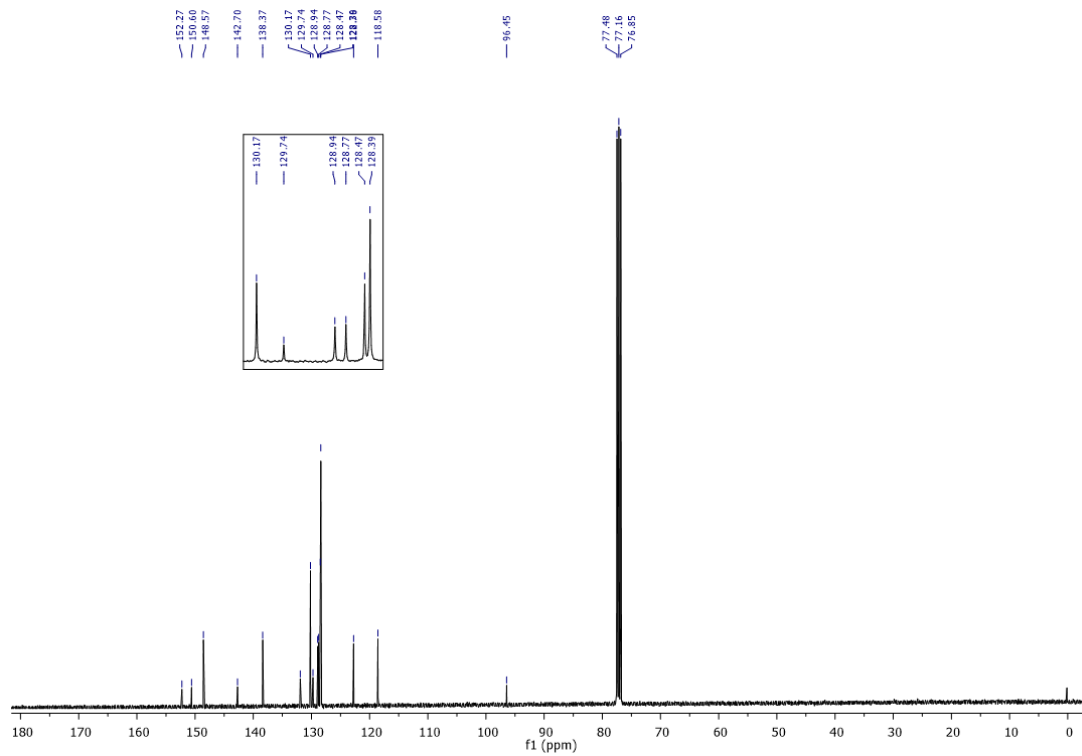

**<sup>13</sup>C NMR Spectra of 3d**

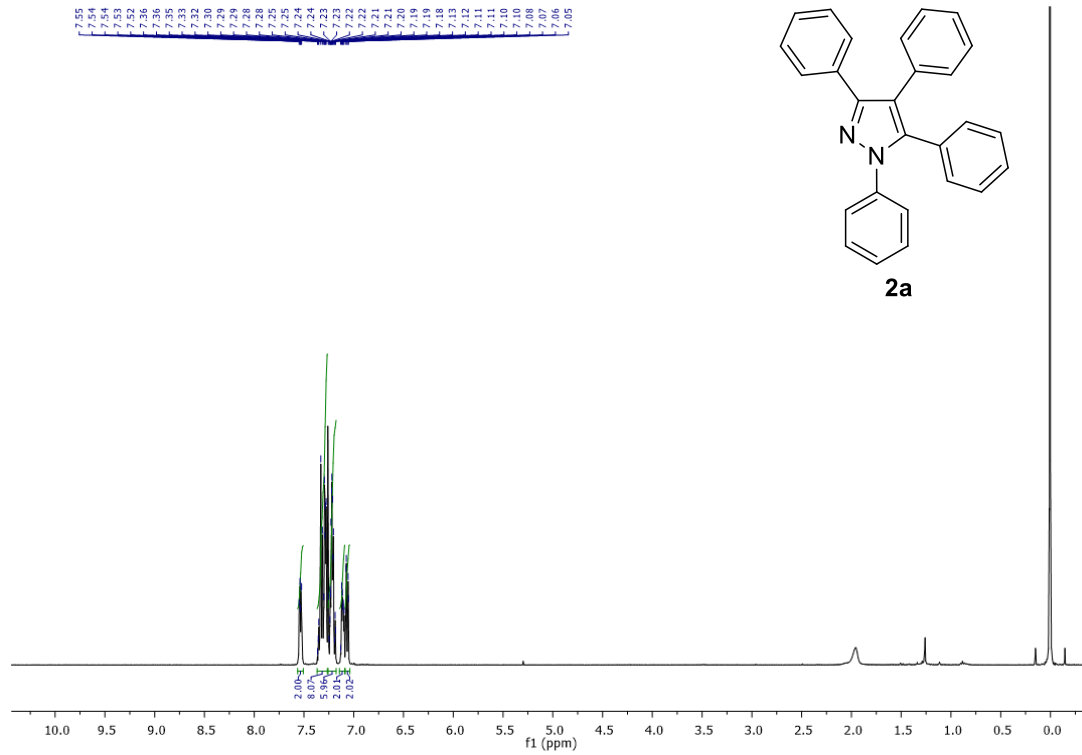

<sup>1</sup>H NMR Spectra of **2a**

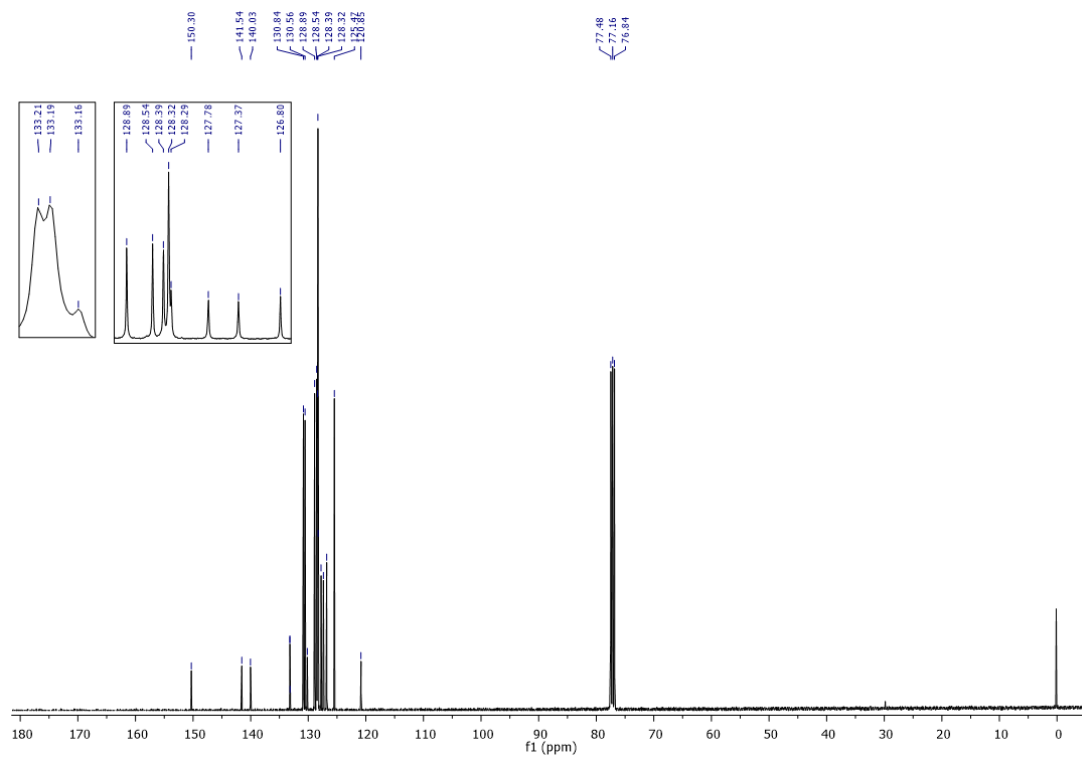

<sup>13</sup>C NMR Spectra of **2a**

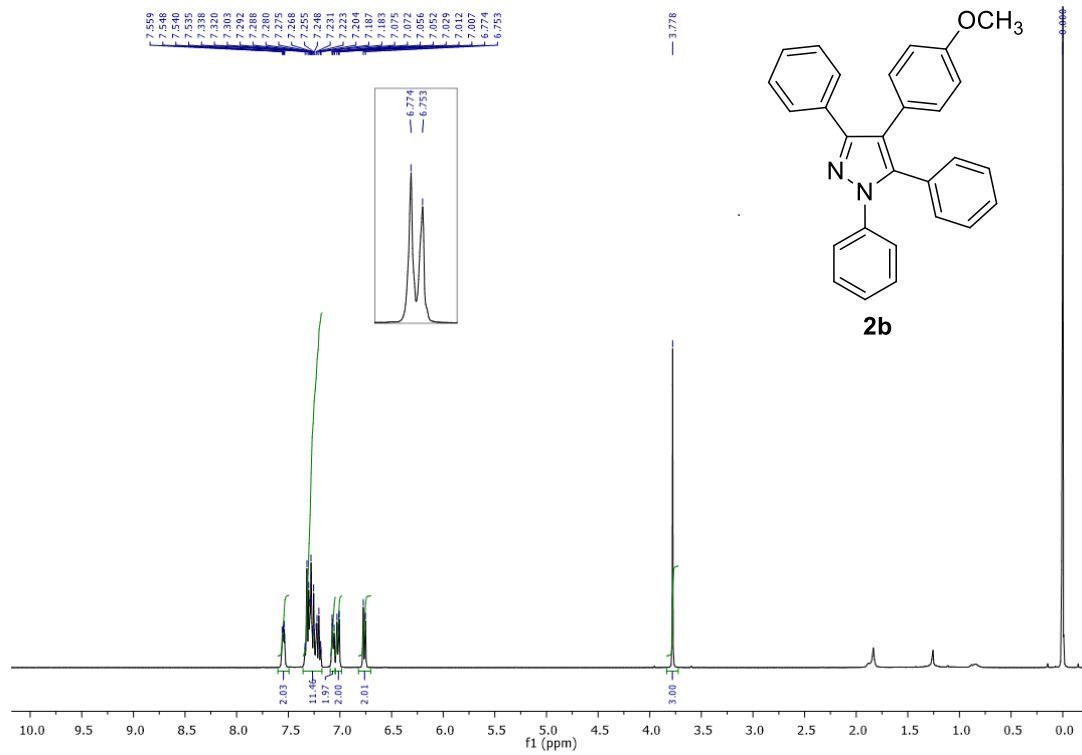

<sup>1</sup>H NMR Spectra of **2b**

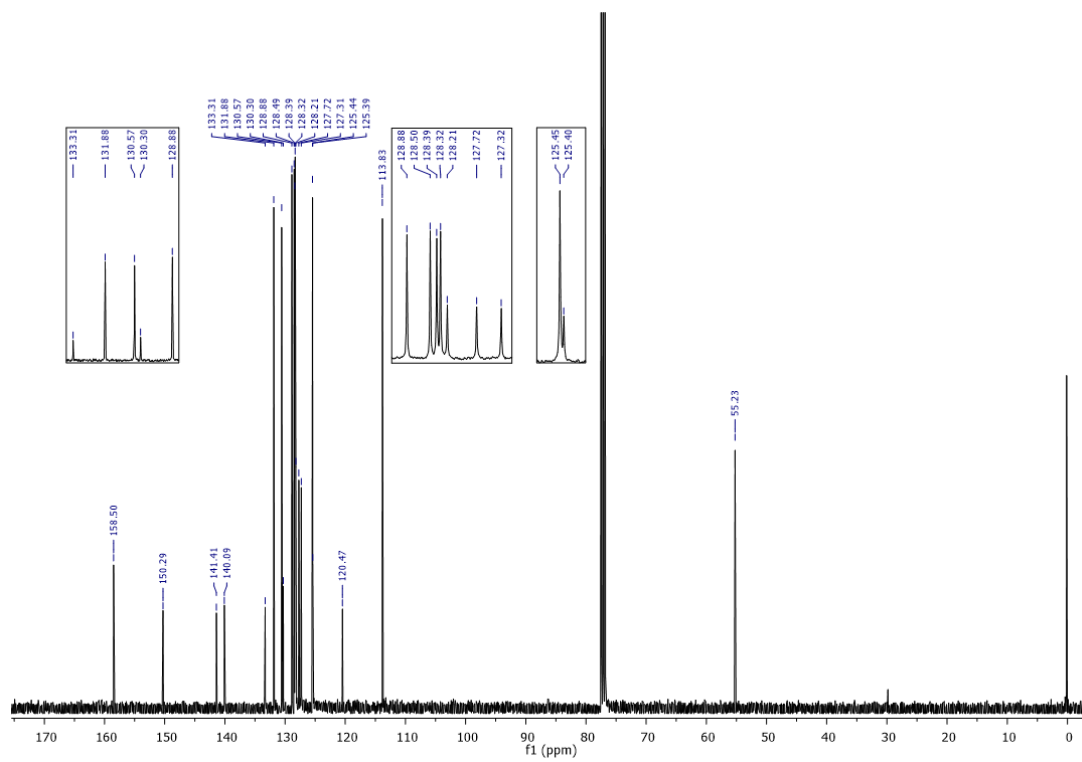

<sup>13</sup>C NMR Spectra of **2b**







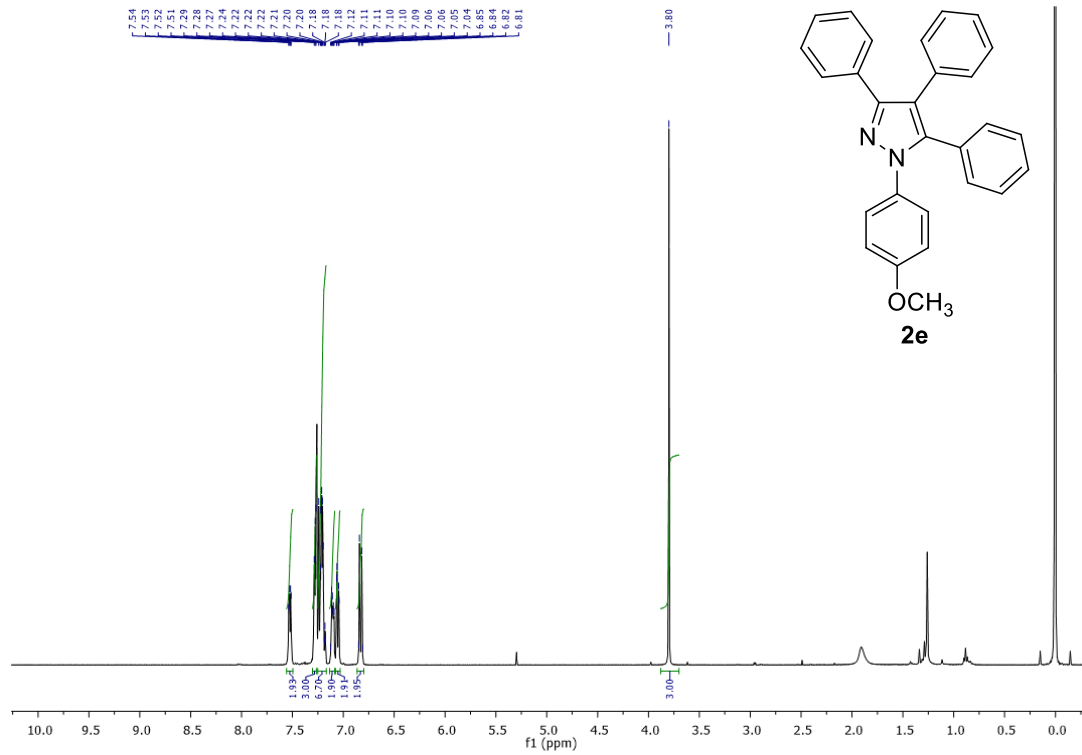

<sup>1</sup>H NMR Spectra of **2e**

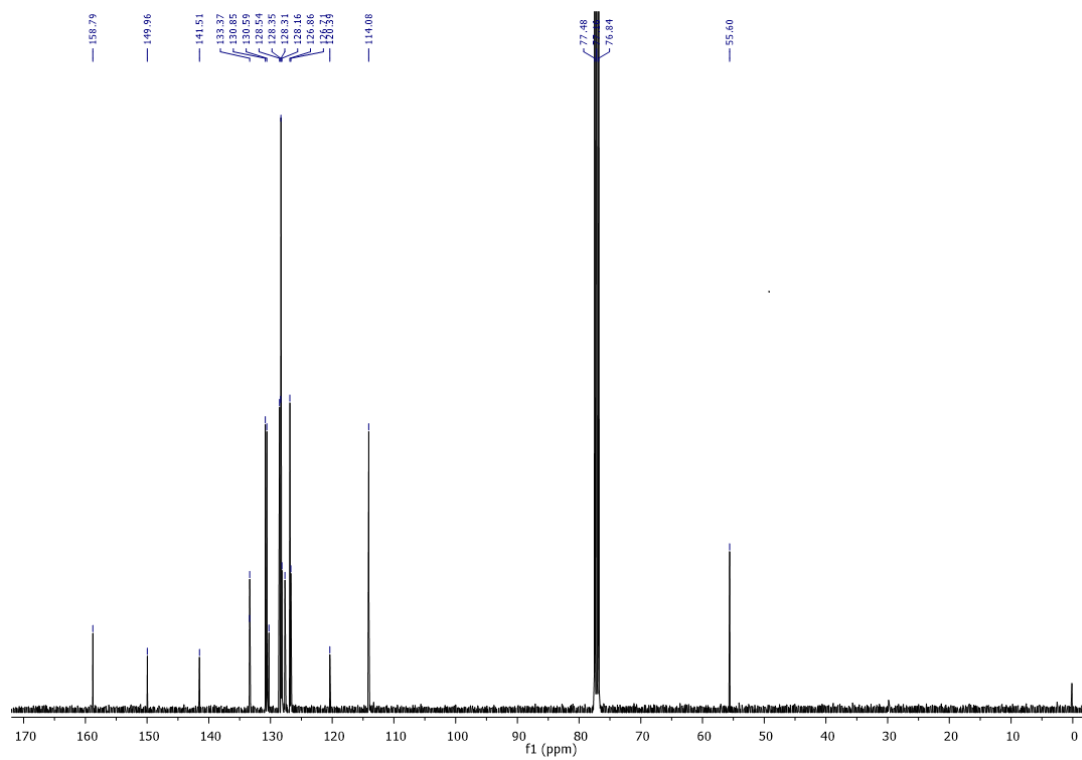

<sup>13</sup>C NMR Spectra of **2e**

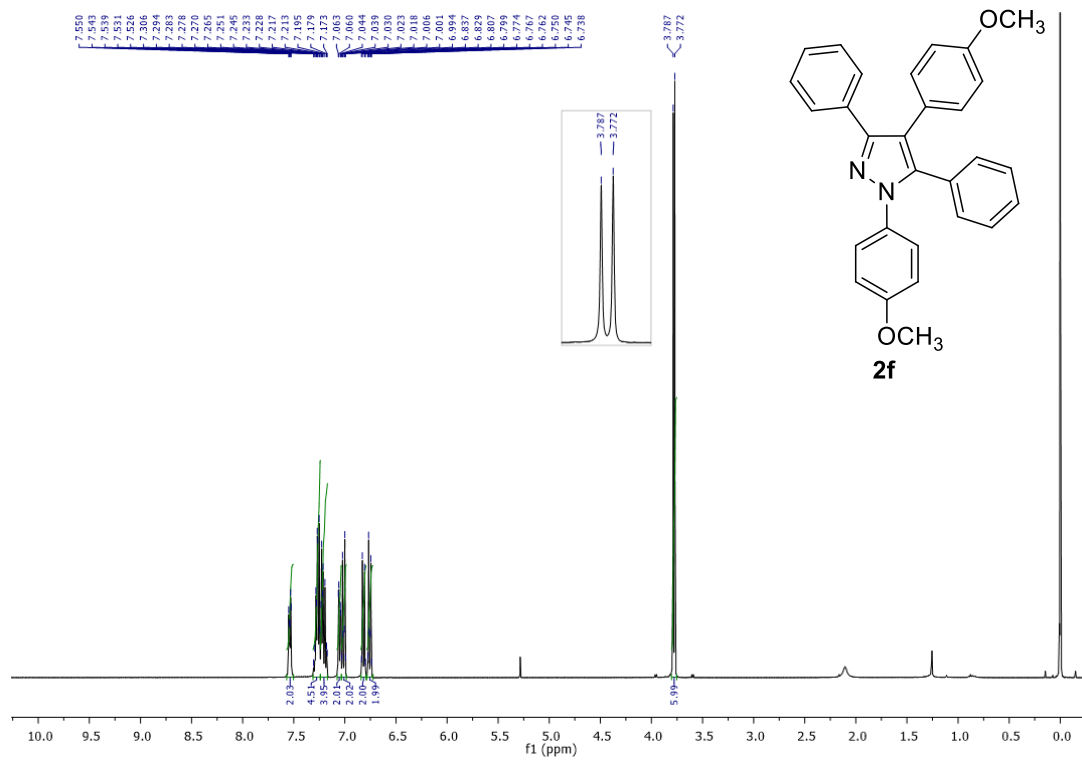

**<sup>1</sup>H NMR Spectra of 2f**

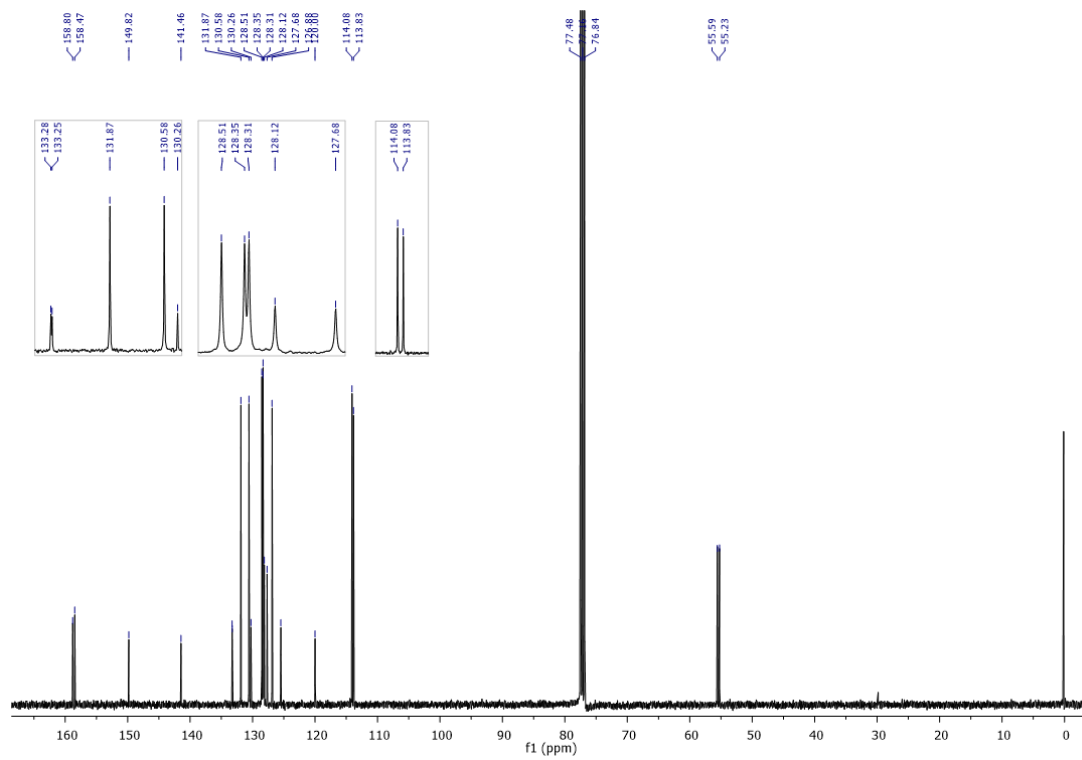

**<sup>13</sup>C NMR Spectra of 2f**





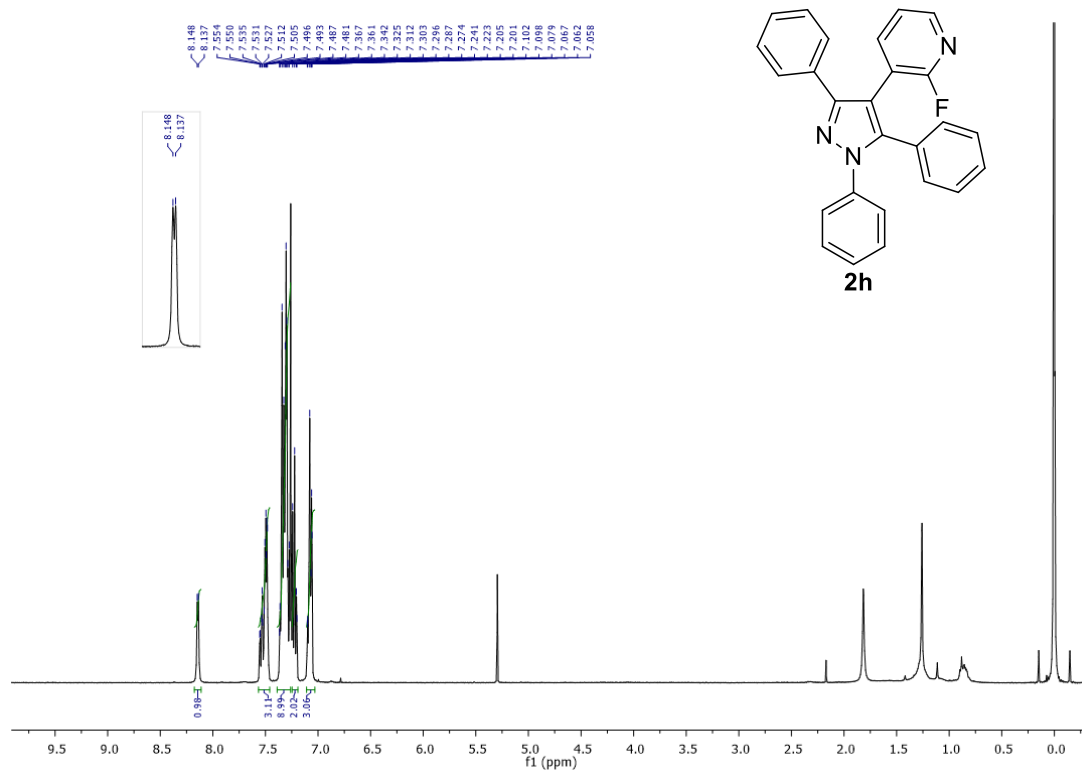

**1H NMR Spectra of 2h**

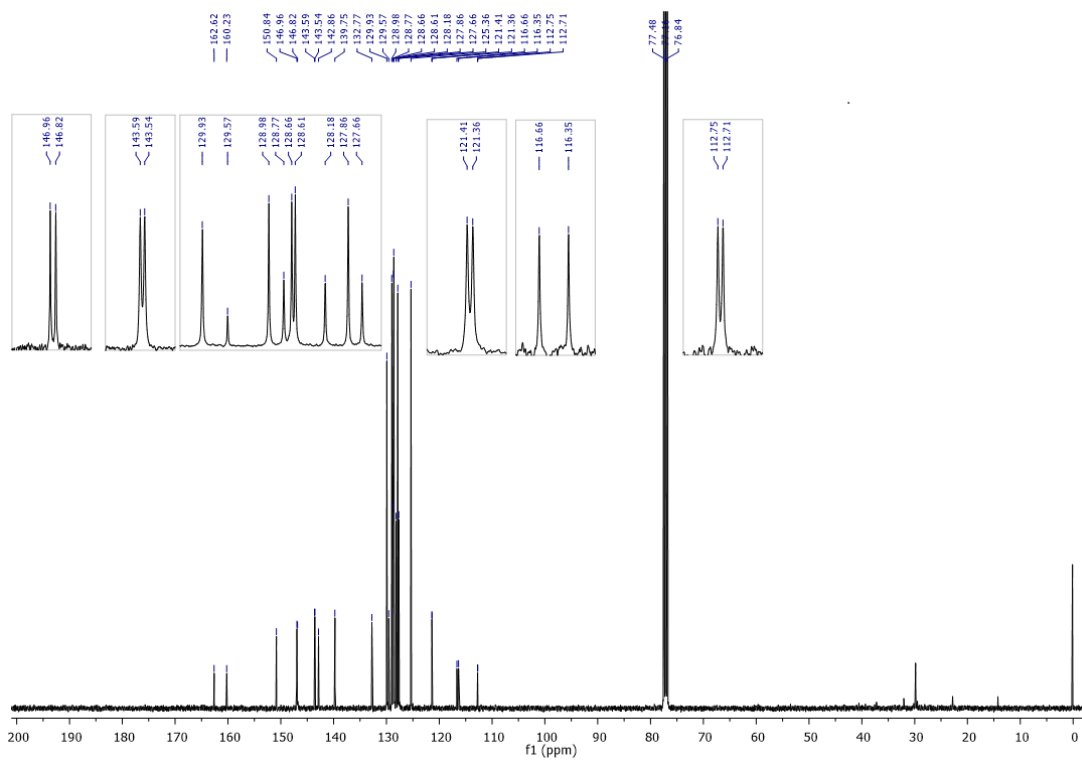

**13C NMR Spectra of 2h**
